# Supplementary material for: B cell maturation antigen–specific CAR T cells are clinically active in multiple myeloma
Source: JCI journal article supplement (doi:10.1172/jci126397), 2019-03-21
Supplement: sd1 [file 1]

## SUPPLEMENTARY MATERIALS

Supplementary methods

Fig. S1: Consort diagram

Fig. S2: Additional clinical outcomes for treated subjects

Fig. S3: Representative gating and staining of T cells for CART-BCMA

Fig. S4: Expansion of CART-BCMA cells: Cohort 1

Fig. S5: Expansion of CART-BCMA cells: Cohort 2

Fig. S6; Expansion of CART-BCMA cells: Cohort 3

Fig. S7: Serum cytokine changes after CART-BCMA treatment

Fig. S8: Serial soluble BCMA concentrations reflect disease response and progression.

Fig. S9: Representative gating for myeloma cells and BCMA staining

Fig. S10: PFS and OS based on baseline BCMA intensity

Fig. S11: Peak CART-BCMA expansion is not associated with baseline clinical characteristics, baseline BCMA expression or sBCMA concentration

Fig. S12: Response is not associated with baseline clinical characteristics, baseline BCMA expression or sBCMA concentration

Table S1: University of Pennsylvania Grading Scale for Cytokine Release Syndrome

Table S2: Individual subject characteristics

Table S3: CART-BCMA Manufacturing/final product details

Table S4: Individual subject adverse events

Table S5: Cytokine release syndrome (CRS) and neurotoxicity by cohort

Table S6: Characteristics of peripheral blood CART-BCMA cells at peak expansion

Table S7: CART-BCMA engraftment by qPCR in blood, bone marrow, and other sites

Table S8: Peak fold increase in serum cytokines and severity of cytokine release syndrome (CRS)

Table S9: Peak fold increase in serum cytokines and neurotoxicity

Table S10: Details of BCMA expression on myeloma cells

Supplementary References

## Supplementary Methods

*Reagents and protocols for flow cytometry:* Antibodies for CAR T cell detection panels were anti-CD45 V450 (clone HI30), anti-CD14 V500 (clone M5E2), anti-CD56 Ax488 (clone B159), anti-CD4 PerCP-Cy5.5 (clone RPA-T4), anti-CD8 APC-H7 (clone SK1) (all from BD Bioscience). Also, anti-CD3 BV605 (clone OKT3), anti-HLA-DR BV711 (clone L243), anti-CD19 PE-Cy7 (clone H1B19) were used from Biolegend. CART-BCMA expression was assessed by using a bis-biotinylated BCMA-Fc recombinant protein and the secondary staining reagent Streptavidin-PE from BD Bioscience (cat#554061). Cells were resuspended in 100  $\mu$ L PBS containing 1% fetal bovine serum, 0.02% sodium azide and bis-biotinylated BCMA-Fc and incubated for 30 min on ice, washed, resuspended in 100  $\mu$ L PBS containing 1% fetal bovine serum, 0.02% sodium azide, surface antibodies and SA-PE, and incubated for 30 minutes on ice, washed, resuspended in 250  $\mu$ L PBS containing 1% fetal bovine serum and 0.02% sodium azide and acquired using a Fortessa flow cytometer equipped with a violet (405 nm), blue (488 nm), a green (532 nm), and a red (628 nm) laser. Data were analyzed using FlowJo software (Version 10, Treestar). Compensation values were established using eBioscience UltraComp eBeads (eBioscience cat#01-222-42) and DIVA software.

*Quantitative PCR:* Genomic DNA was isolated directly from whole blood or marrow aspirate, and qPCR analysis was performed using ABI TaqMan technology and a validated assay to detect the integrated CAR transgene sequence as described(1) using triplicates of 200 ng of genomic DNA per time point for peripheral blood and marrow samples. To determine copy number per unit DNA, an eight-point standard curve was generated consisting of 5 to 106 copies of lentivirus plasmid spiked into 100 ng of non-transduced control genomic DNA. The number of copies of plasmid present in the standard curve was verified using digital qPCR with the same primer/probe set and performed on a QuantStudio 3D digital PCR instrument (Life Technologies). Each datapoint (sample and standard curve) was evaluated in triplicate with a positive Ct value in three of three replicates with percent coefficient of variation of less than 0.95% for all quantifiable values. To control for the quality of interrogated DNA, we performed a parallel amplification reaction using 20 ng of genomic DNA and a primer/probe combination specific for a non-transcribed genomic sequence upstream of the CDKN1A (p21) gene as described (1). These amplification reactions generated a correction factor to adjust for calculated versus actual DNA input. Copies of transgene per microgram of DNA were calculated according to the formula: copies per microgram of genomic DNA = (copies calculated from CART-BCMA standard curve)  $\times$  correction factor/(amount DNA evaluated in nanograms)  $\times$  1000 ng.

*Measurement of serum cytokines:* Human cytokine magnetic 30-plex panel (LHC6003M) was from Life Technologies. Serum samples collected at baseline and at scheduled time-points out until 28 days post-infusion were cryopreserved at -80°C. Batched samples were thawed and analyzed according to the manufacturers' protocols. Assay plates were measured using a FlexMAP 3D instrument, and data acquisition and analysis were done using xPONENT software. Data quality was examined based on the following criteria. The standard curve for each analyte has a 5P R<sup>2</sup> value > 0.95 with or without minor fitting using xPONENT software. To pass quality control, the results for an in-house control serum needed to be within the 95% of CI (confidence interval) derived from historical in-house control data for >25 of the tested analytes. No further tests were done on samples with results out of range low (<OOR). Samples with results that were out of range high (>OOR) or greater than two times the standard curve

maximum value (SC max) were re-tested at higher dilutions. Results that passed the above quality controls or retests were reported.

*Measurement of soluble BCMA, BAFF, and APRIL:* Antibody sets for human BCMA (DY193), APRIL (DY884B) and BAFF (DT124-05) were from R&D Systems. ELISA bead-strip and 4-column reservoir (SOW-A16735) were from Assay Depot. ELISA substrate ADHP (10010469) was from Cayman Chemical. Assay plates (OX1263) were from E&K Scientific. All ELISA reagents were prepared according to the protocols for DuoSet ELISA except for Color Reagent B, which was supplemented with ADHP at 100  $\mu$ M. Due to limited volumes of sera and lack of availability of a Luminex assay for BCMA, APRIL and BAFF, the three analytes were measured using ELISA bead-strips. Instead of coating the capture antibody (cAB) to the wells of an ELISA plate, it was coated on the surfaces of macrospheres, which enabled the measurement of all three analytes using 100  $\mu$ l of serum. Assays were set up using bead-strips in assay plates based on an assay map following the protocol for antibody sets. At the end of the assay, one substrate plate per 12 bead-strips was prepared by adding 100  $\mu$ l/well of substrate solution (1:1 of color reagent A and ADHP). Each bead-strip was placed in one column of the substrate plate according to the assay map. Color development was for 10 to 30 minutes. Plates were read on a FLUO STAR OMEGA instrument. Data quality control was performed as described for Luminex data.

*Assessment of bone marrow myeloma cells, including BCMA expression:* Flow cytometry assessment of bone marrow aspirate material was performed directly on aspirate following a brief ammonium chloride red blood cell lysis step. The procedure was adapted from the EuroFlow protocol (2). Briefly, up to 2mls of bone marrow aspirate was diluted with 48mls of Pharm Lyse solution (BD Biosciences Cat# 555899) and incubated for 15 minutes at room temperature on a shaking device. The cells were then collected by centrifugation for 10 minutes at 800g, washed twice with flow cytometry buffer (PBS with 1% fetal bovine serum), stained with L/D Aqua viability dye (Thermo Fisher Cat# L34957). Surface staining was done with a mixture of antibodies to CD45, CD19, CD138, CD38, CD14, CD56, CD20, CD3, CD269 (BCMA), CD274 (PD-L1). FMO (fluorescence minus one) secondary only controls were used for BCMA evaluation. Aliquots of normal donor PBMC cells were stained in parallel as controls. The cells were then washed before permeabilization/fixation using Cytotfix/Cytoperm reagent (BD Biosciences) for 20 minutes at room temperature, washed, and stained with a mixture of antibodies to kappa and lambda immunoglobulin light chains. The samples were then washed before resuspension in PBS and acquisition on a 17-color LSR Fortessa Special Order Research Product flow cytometer (BD) equipped with a violet, blue, green, and red laser. A minimum of  $5 \times 10^6$  cells were acquired per sample. List mode files were analyzed using either FlowJo (Treestar) or FCS Express.

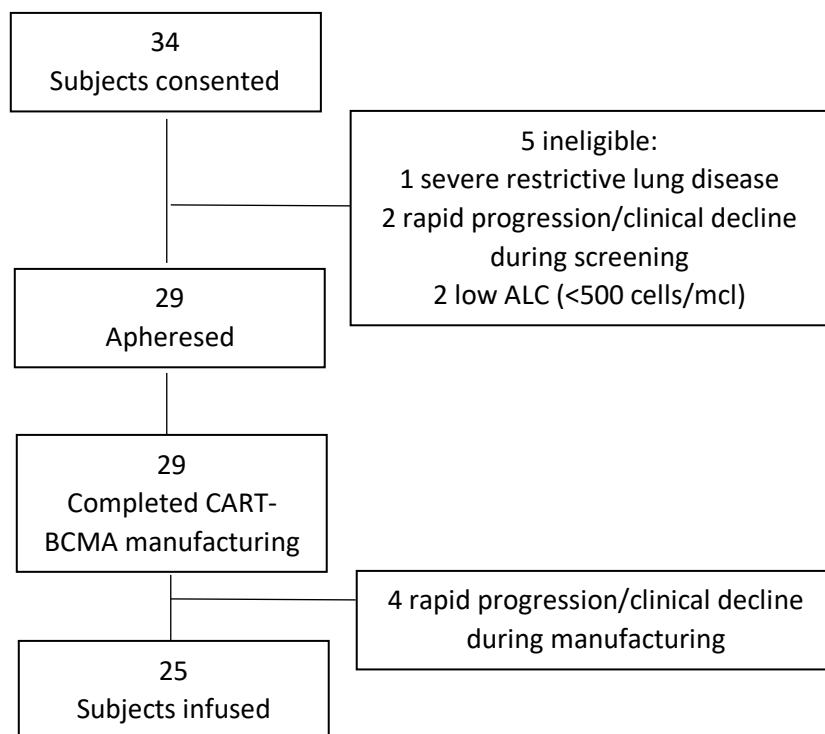

**Figure S1: CONSORT diagram showing subject enrollment**

ALC = absolute lymphocyte count

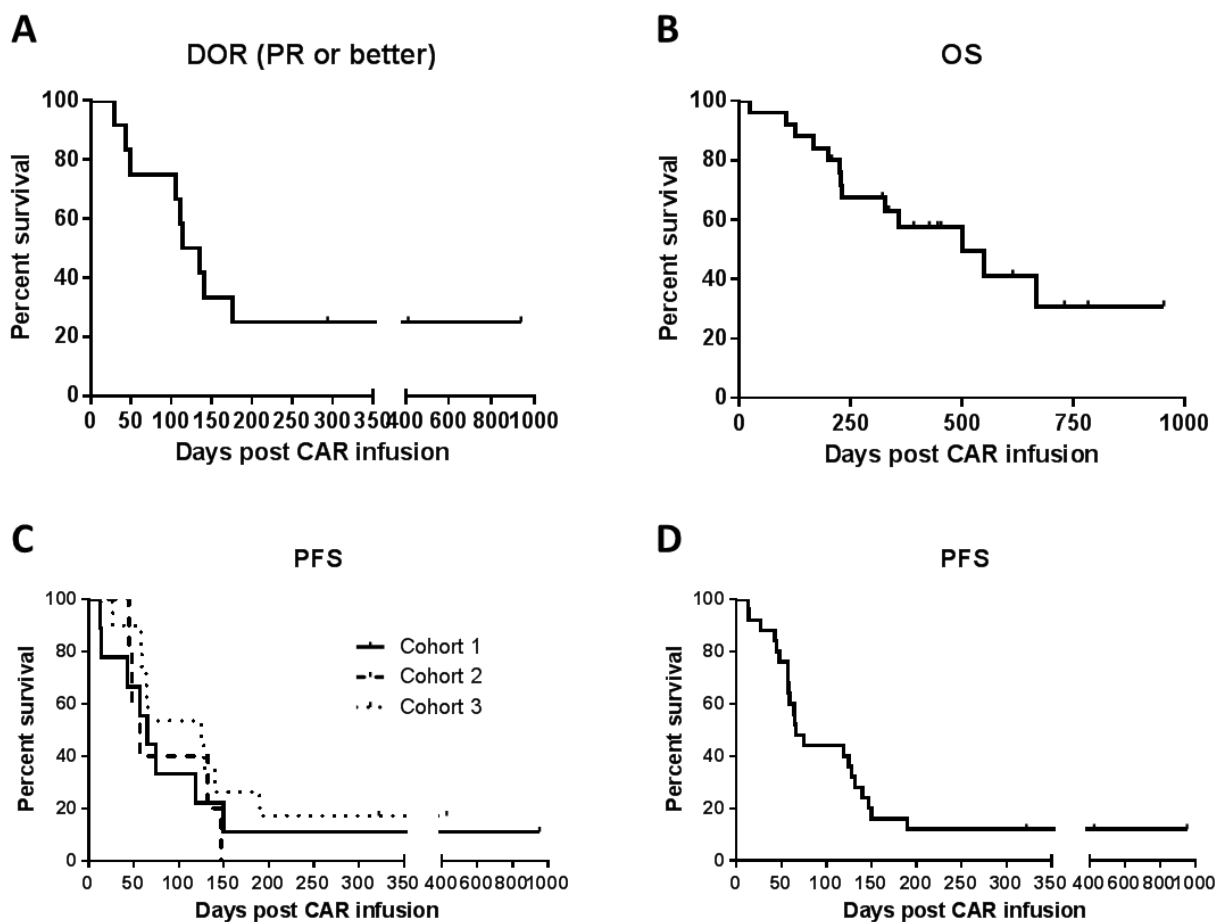

**Figure S2: Additional clinical outcomes for treated subjects.** A: Duration of response (DOR) for all subjects with partial response (PR) or better. B: Overall survival (OS) for all subjects. C: Progression-free survival (PFS) by cohort. D: PFS for all subjects. Curves derived by Kaplan-Meier method.

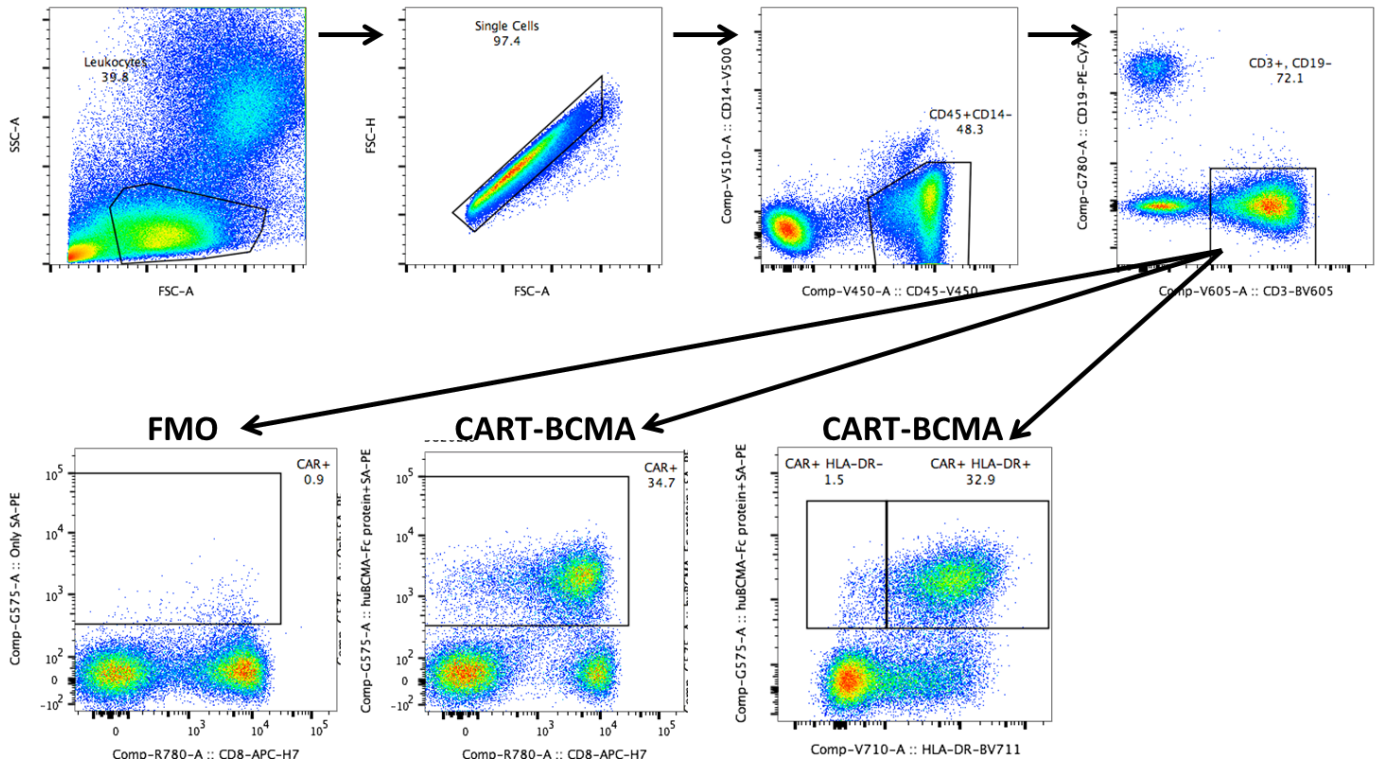

**Figure S3: Representative gating and staining for CART-BCMA cells.** Staining is shown for peripheral blood from subject 01, day +7 after first CART-BCMA infusion. Cells are gated by forward and side scatter, then singlets, then CD45+CD14- leukocytes, then T cells (CD3+CD19-). CART-BCMA+ cells were identified using biotinylated recombinant human BCMA-Fc and streptavidin-PE. Negative control was an FMO (fluorescence minus one) tube (lacking biotinylated BCMA-Fc) with streptavidin-PE. The % of CD3+ T cells expressing CART-BCMA was calculated by subtracting CAR+ cells in FMO tube from CAR+ cells in tube with biotinylated BCMA-FC (i.e. in this example  $34.7 - 0.9 = 33.8$ ). Activation status of CART-BCMA+ cells was identified by staining for HLA-DR (bottom right panel). The % of CAR+ cells that were activated at each timepoint was calculated by dividing %HLA-DR+ by (%HLA-DR+ plus %HLA-DR-) (i.e. in this example  $32.9/(32.9 + 1.5) = 95.6\%$ ).

# CART-BCMA FOR REFRACTORY MM

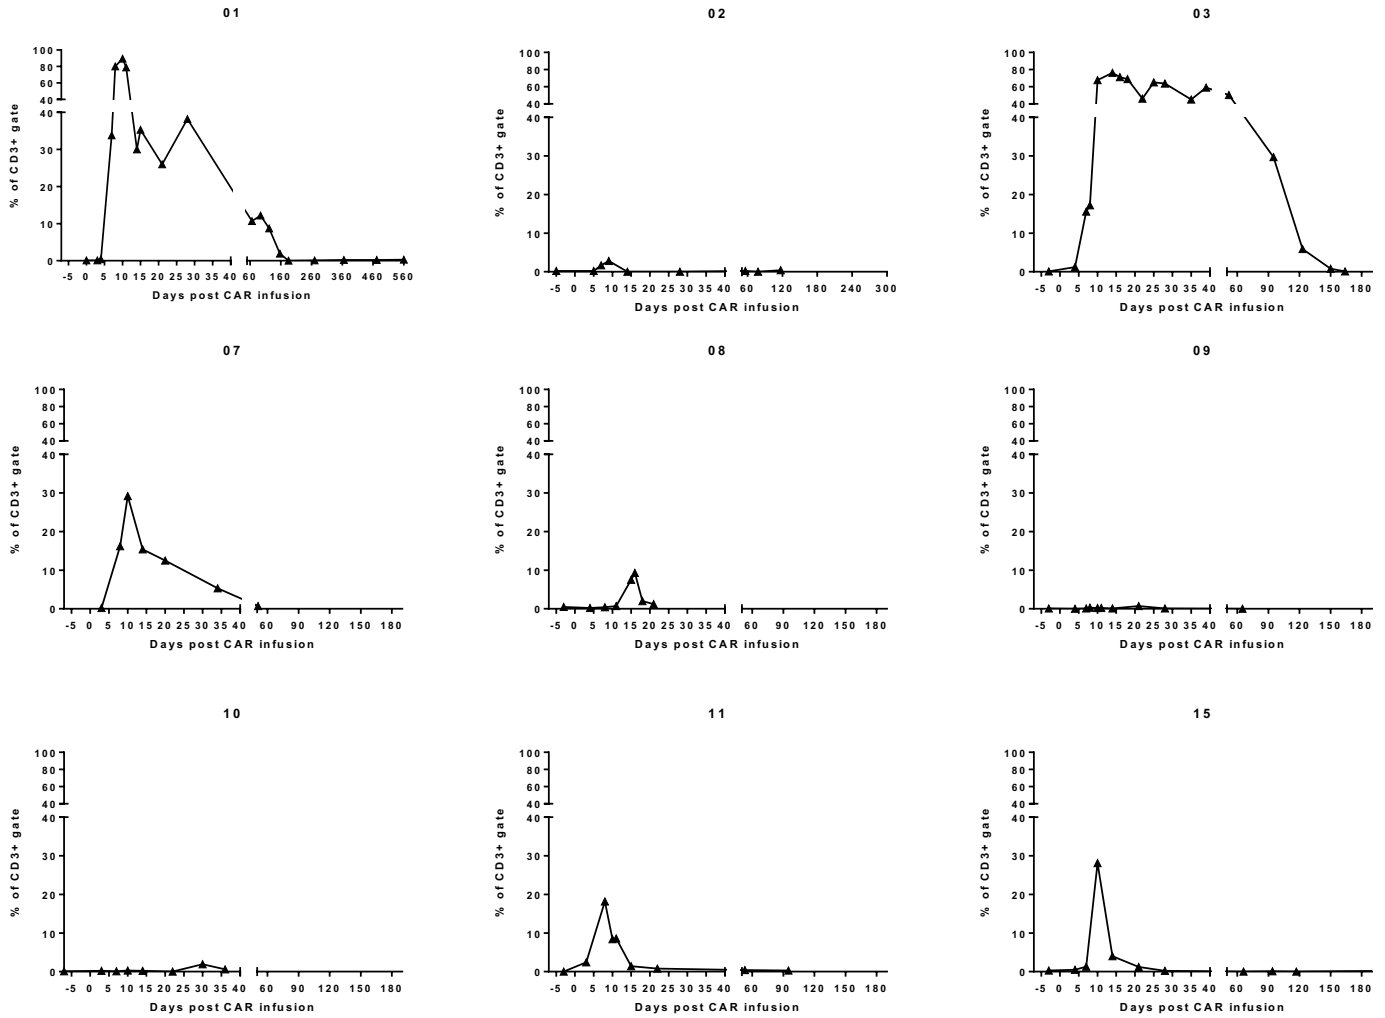

**Figure S4: Expansion of CART-BCMA cells: Cohort 1.** The frequency of CAR+ T cells within all peripheral blood CD3+ T cells, as measured by flow cytometry, is depicted for each subject.

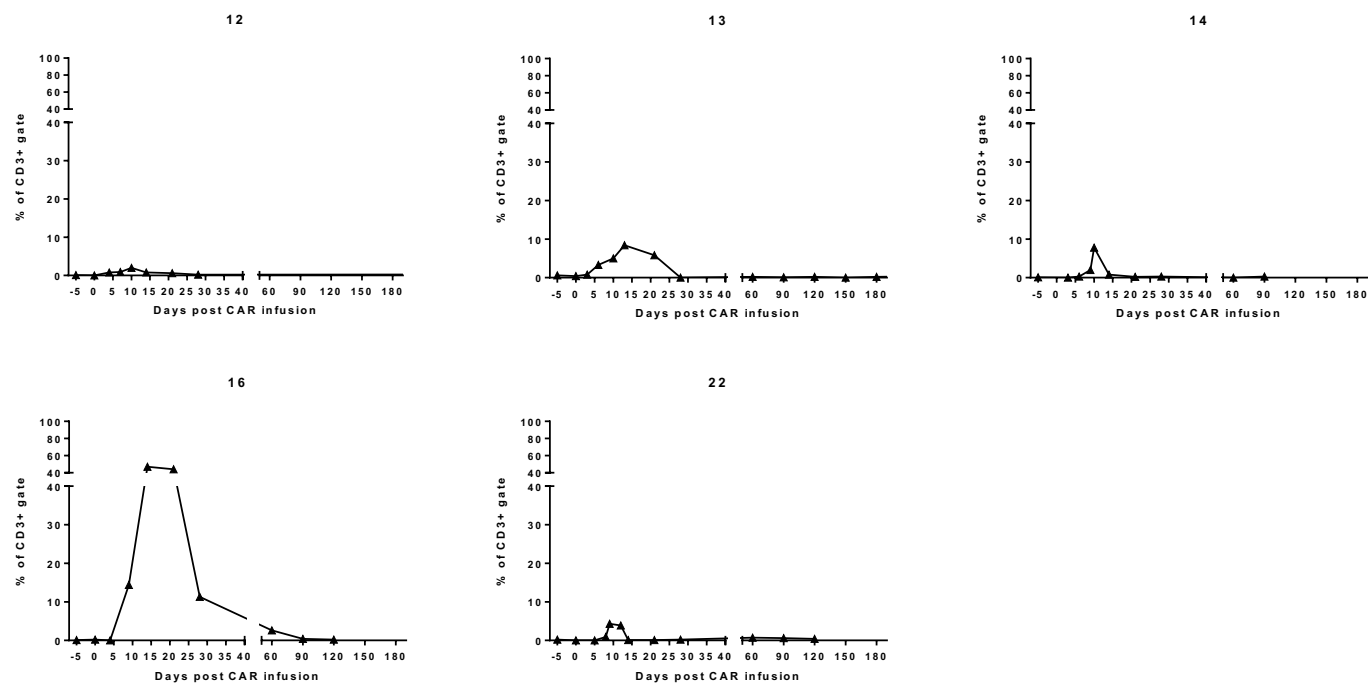

**Figure S5: Expansion of CART-BCMA cells: Cohort 2.** The frequency of CAR+ T cells within all peripheral blood CD3+ T cells, as measured by flow cytometry, is depicted for each subject.



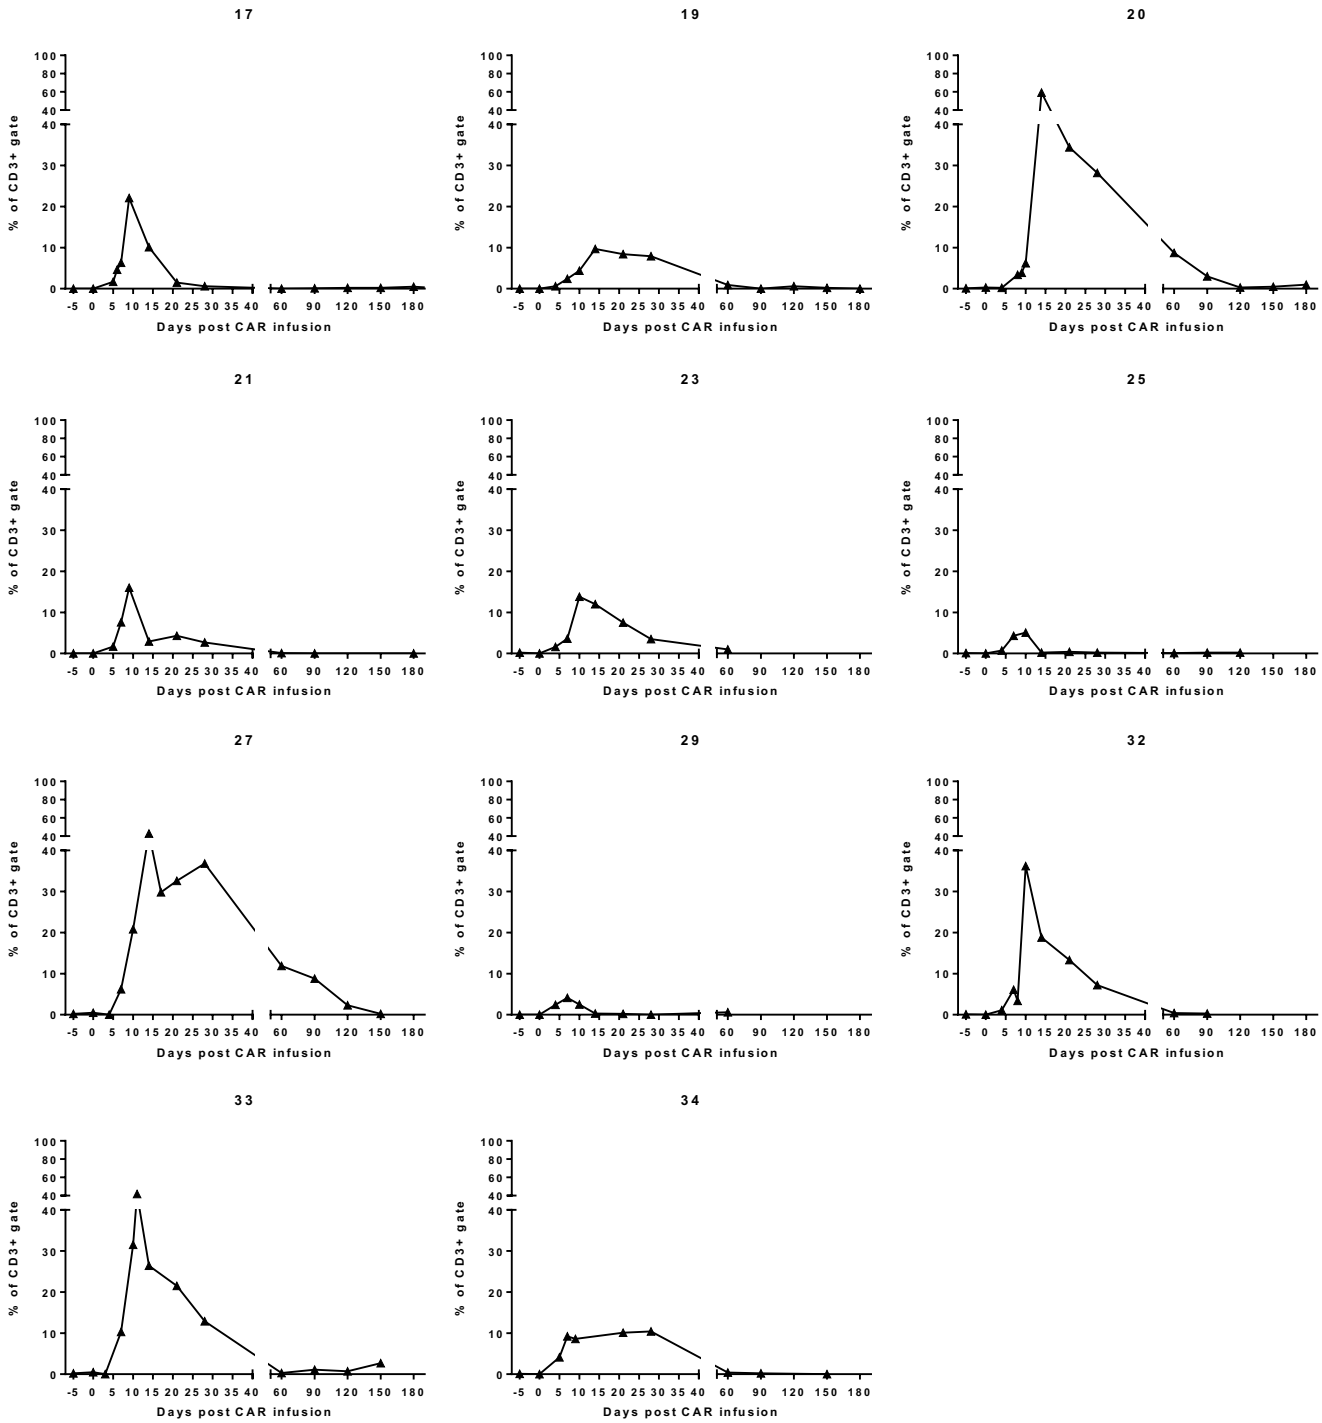

**Figure S6: Expansion of CART-BCMA cells: Cohort 3.** The frequency of CAR+ T cells within all peripheral blood CD3+ T cells, as measured by flow cytometry, is depicted for each subject.

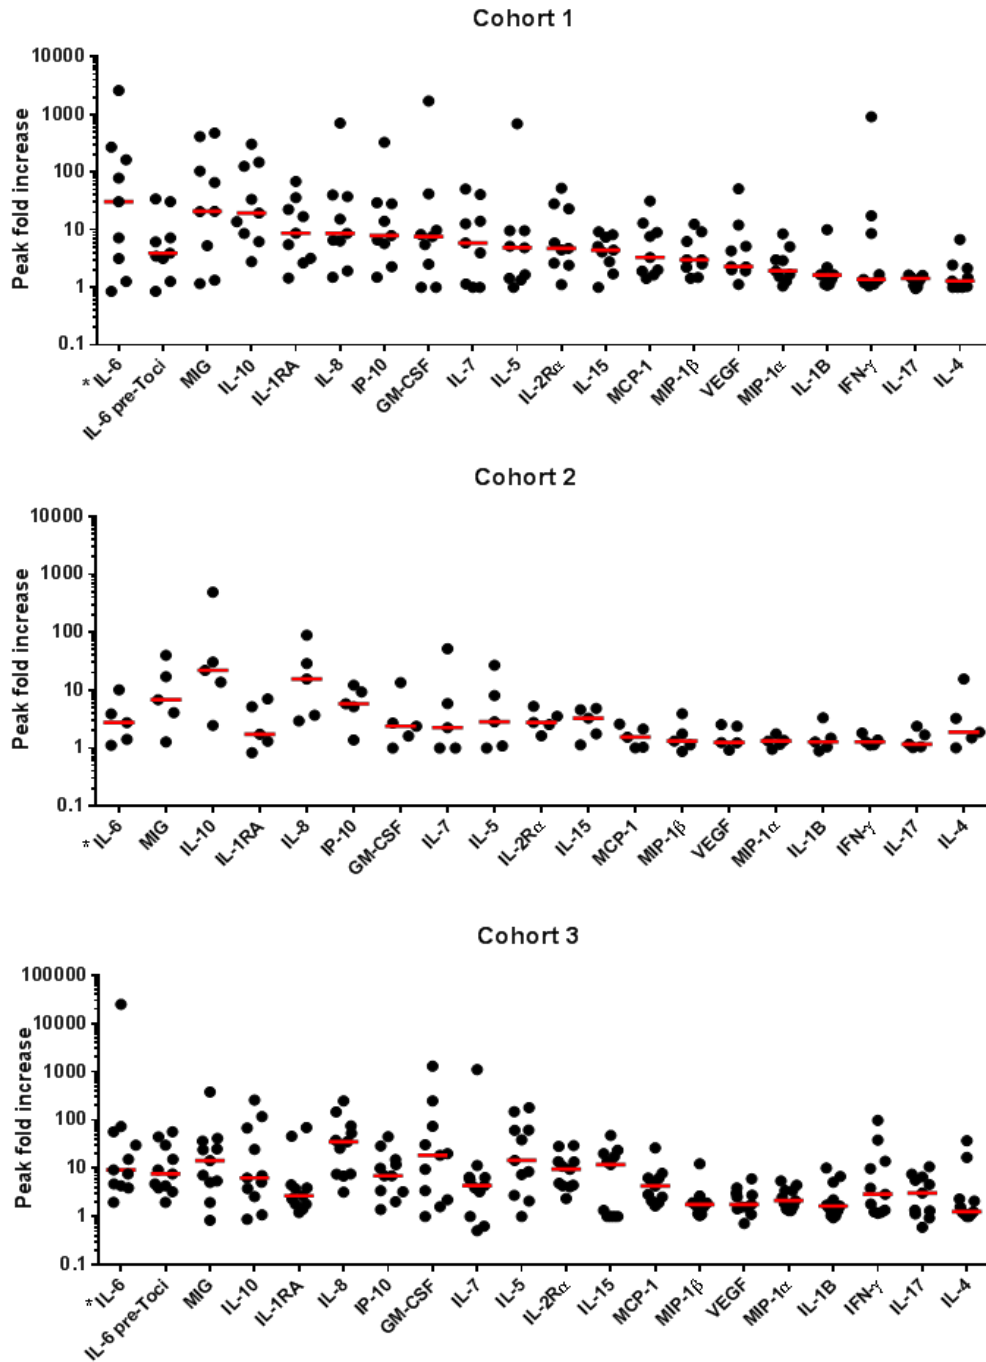

**Figure S7: Serum cytokine changes after CART-BCMA treatment.** Concentrations (pg/ml) of peripheral blood cytokines were assessed at multiple time-points by Luminex assay. The peak fold increase over baseline for the most frequently elevated cytokines over first 28 days post-infusion are shown, based on cohort. Red line depicts median. \*Peak fold-increase of IL-6 at any time post-infusion. IL-6 pre-Toci = for subjects who got tocilizumab (n=6) or siltuximab (n=1), only pre-tocilizumab or pre-siltuximab IL-6 values are included. No subject in Cohort 2 received tocilizumab or siltuximab.

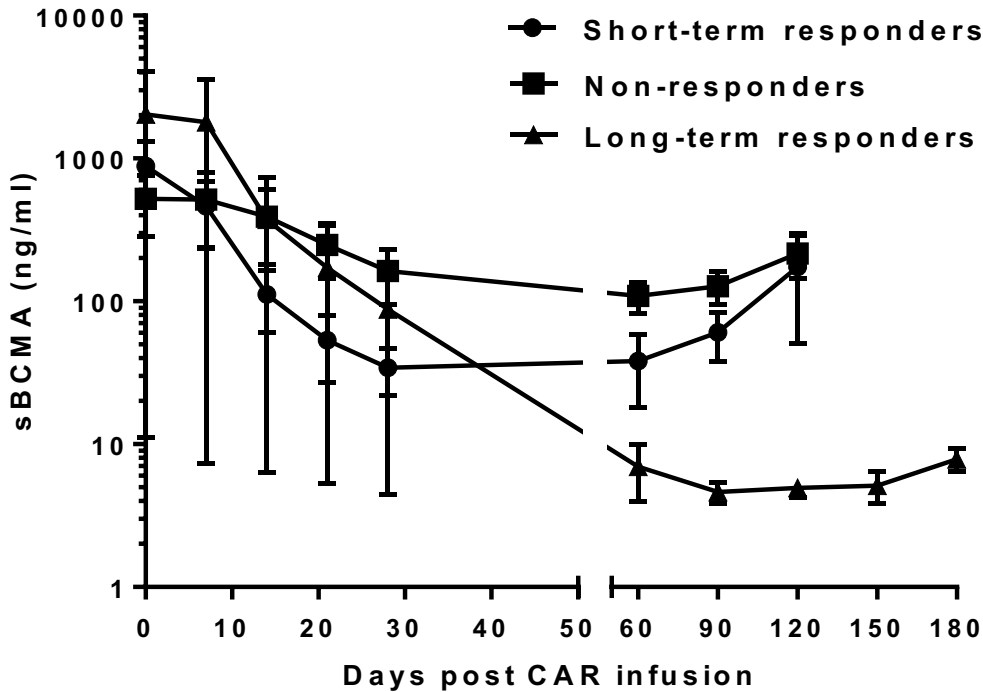

**Figure S8: Serial soluble BCMA concentrations reflect disease response and progression.**

Serum concentration of soluble BCMA (sBCMA) was assessed by ELISA at multiple time-points post-CART-BCMA infusion. Groups are divided into Short-term responders (PR or better lasting  $\leq 6$  months,  $n=9$ ), Long-term responders (PR or better lasting  $>6$  months,  $n=3$ ), or Non-responders (MR, SD, or PD,  $n=13$ ). Mean concentration (ng/ml) + SEM are depicted. Only 3 Short-term responders and 1 Non-responder had data at day 150 and 180, so these are not depicted. Before day 28, serial sBCMA concentrations decline at a similar trajectory for both short-term and long-term responders, and both decline more rapidly than non-responders ( $p=0.03$  for long-term responders vs. non-responders;  $p<0.001$  for short-term responders vs. non-responders). After day 28, the slopes of the curves are not significantly different between short-term responders and non-responders ( $p=0.848$ ), but the slope remains different for long-term responders ( $p=0.05$  for long-term responders vs. non-responders;  $p=0.016$  for long-term responders vs. short-term responders). The estimation was based on a linear random intercept mixed effects model on log10-transform sBCMA that included two piecewise linear splines connected at day 28; p-values were determined based on z test for the regression coefficient of interest or a linear combination of the coefficients.

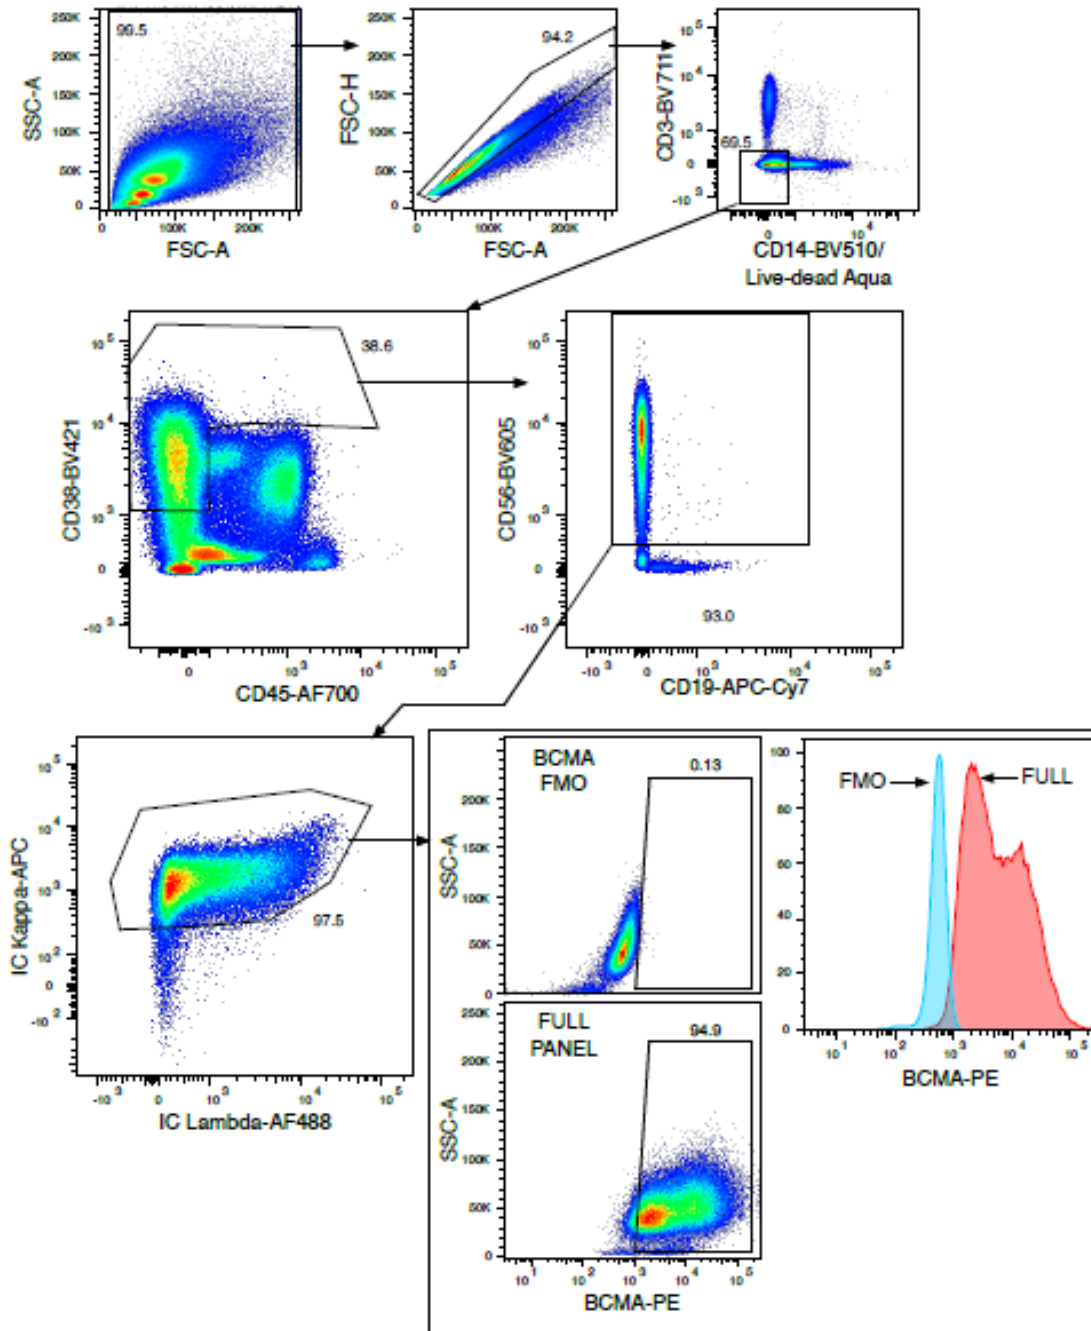

**Figure S9: Representative gating for myeloma cells and BCMA staining.** Bone marrow aspirate cells were gated by forward and side scatter, then by singlets, then on CD3-CD14- cells. Myeloma cells were identified by gating first on CD38<sup>hi</sup> cells, then by gating on clonal plasma cells using CD19, CD56, and kappa/lambda staining. In this example, myeloma cells are CD19-CD56+kappa+. The % BCMA + was determined using an FMO tube lacking anti-BCMA antibody.

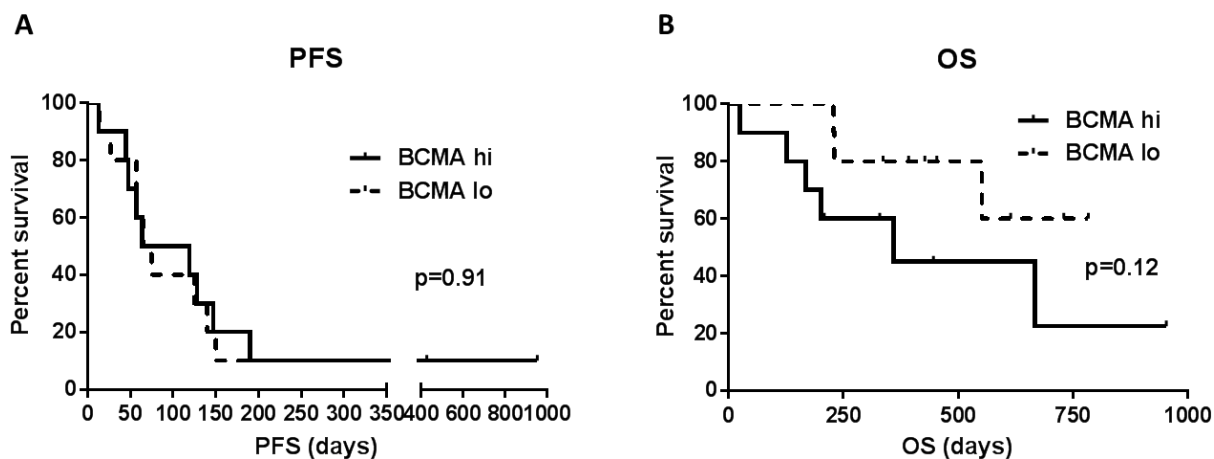

**Figure S10: PFS and OS based on baseline BCMA intensity:** Subjects evaluable for baseline BCMA expression by flow cytometry (n=20) were divided into BCMA hi (MFI > median value of 3741) and BCMA lo (MFI < median) and assessed for progression-free (A) and overall (B) survival. Curves derived by Kaplan-Meier method. P-values determined by log-rank test (p-value < 0.05 considered significant).

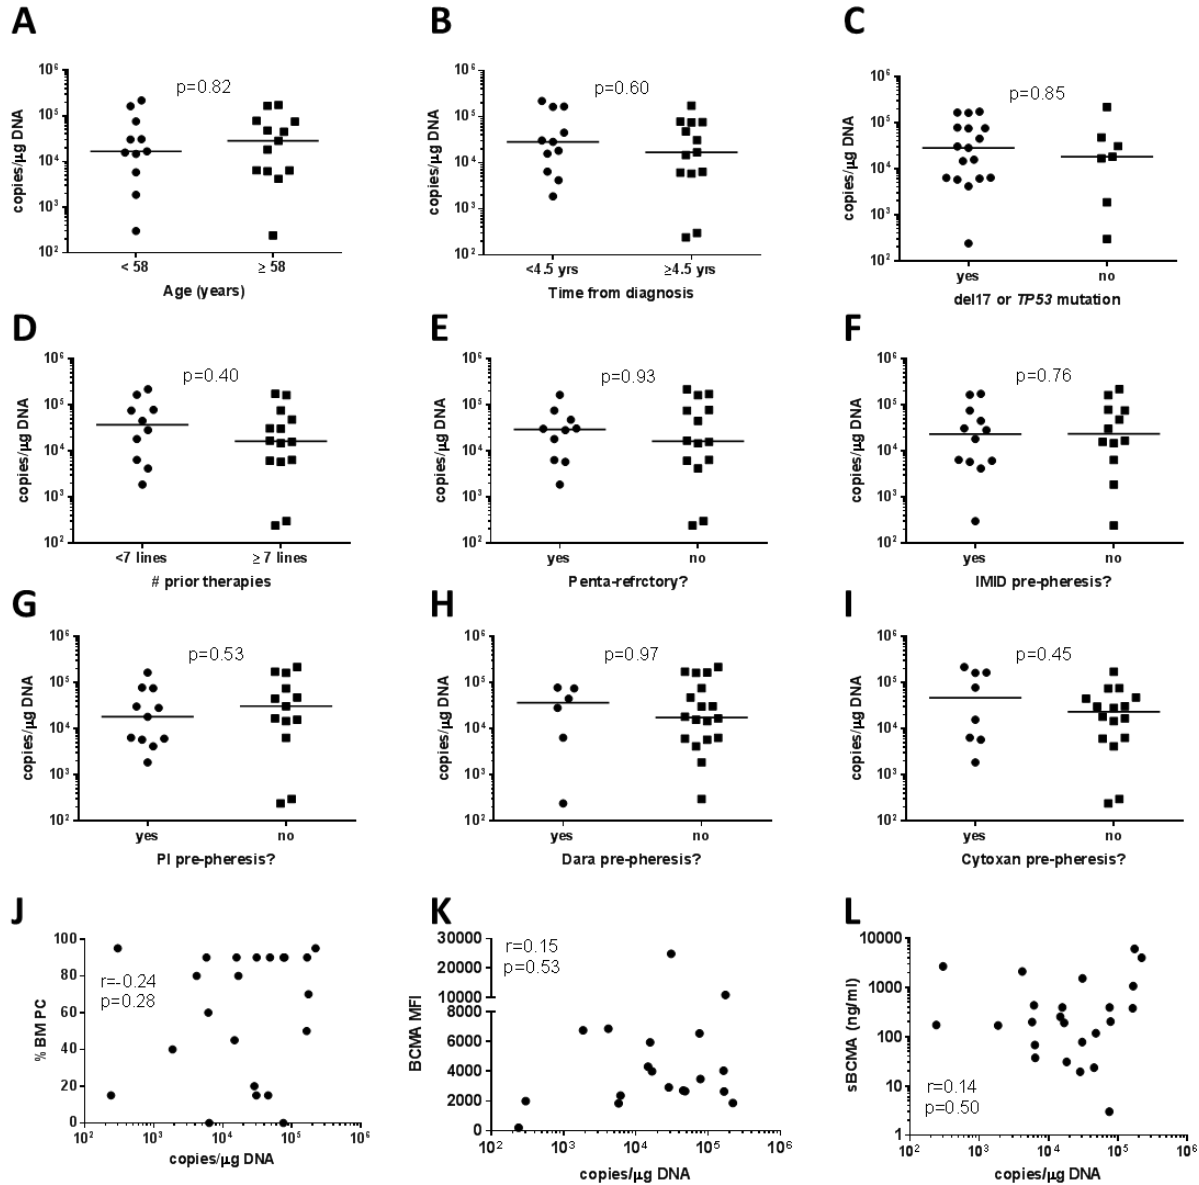

**Figure S11: Peak CART-BCMA expansion is not associated with baseline clinical characteristics, baseline BCMA expression or sBCMA concentration.** Peak CART-BCMA level (copies/μg genomic DNA) by qPCR was not significantly associated with (A) age at enrollment (above or below median); (B) years from diagnosis (above or below median); (C) presence of del17p by FISH or TP53 mutation by sequencing; (D) number (#) of therapeutic lines (above or below median); (E) being penta-refractory to 2 proteasome inhibitors (PIs), 2 immunomodulatory drugs (IMiDs) and daratumumab (dara); receiving therapy just prior to leukapheresis that contained (F) an IMiD, (G) a PI, (H) dara, or (I) cyclophosphamide (Cytosan); (J) percentage of pre-treatment bone marrow plasma cells (%BM PC); (K) baseline BCMA mean fluorescence intensity (MFI) on BM PC; or (L) baseline serum soluble BCMA (sBCMA) concentration. For A-I, analysis by Mann-Whitney test; line represents median value. For J-L, analysis by Spearman correlation.

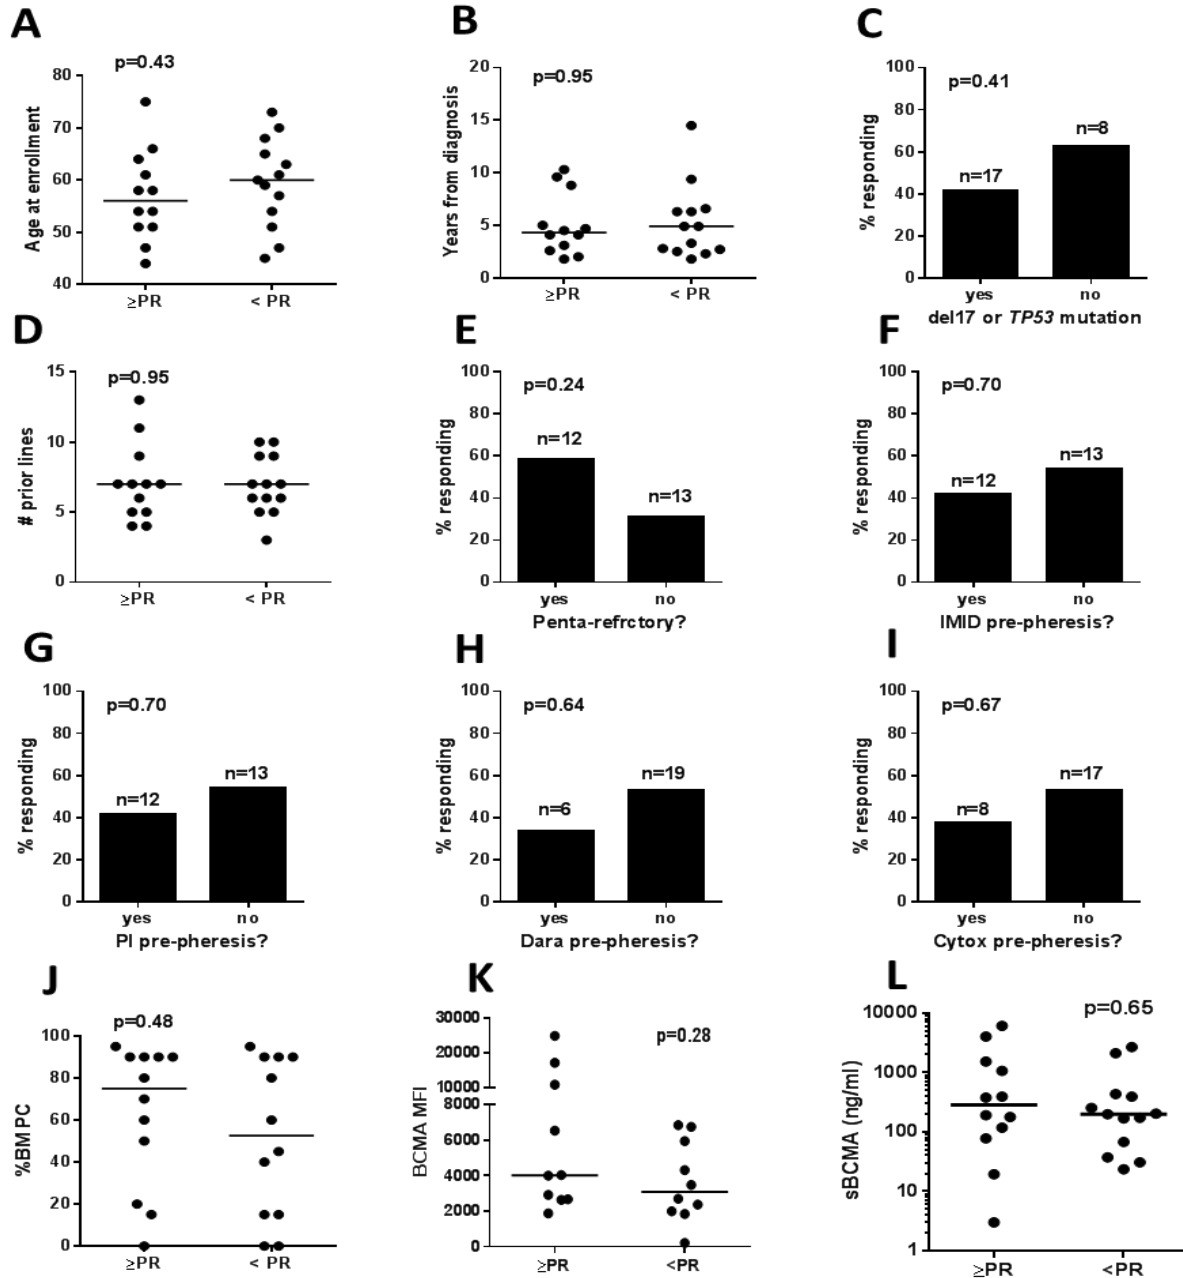

**Figure S12: Response is not associated with baseline clinical characteristics, baseline BCMA expression or sBCMA concentration.** Clinical response ( $\geq$  partial response (PR)) was not significantly associated with (A) age at enrollment (B) years from diagnosis (C) presence of del17p by FISH or TP53 mutation by sequencing; (D) number (#) of therapeutic lines (E) being penta-refractory to 2 proteasome inhibitors (PIs), 2 immunomodulatory drugs (IMiDs) and daratumumab (dara); (F-I) receiving a regimen just prior to leukapheresis that contained an IMiD, a PI, dara, or cyclophosphamide (Cytos); (J) percentage of pre-treatment bone marrow plasma cells (%BM PC); (K) baseline BCMA mean fluorescence intensity (MFI) on BM PC; or (L) baseline serum soluble BCMA (sBCMA) concentration. For C, E-I, analysis by Fisher's Exact test. For A, B, D, J-L, analysis by Mann-Whitney test; line represents median value.

**Table S1**

| University of Pennsylvania CRS Toxicity Grade                                      |                                                                                                                                                                                                                                                                                                                                   |                                                                                                                                                                                                                                                                                                                                                                                                                                                                                                                                                                                                                                                                                                        |                                                                                                                              |       |
|------------------------------------------------------------------------------------|-----------------------------------------------------------------------------------------------------------------------------------------------------------------------------------------------------------------------------------------------------------------------------------------------------------------------------------|--------------------------------------------------------------------------------------------------------------------------------------------------------------------------------------------------------------------------------------------------------------------------------------------------------------------------------------------------------------------------------------------------------------------------------------------------------------------------------------------------------------------------------------------------------------------------------------------------------------------------------------------------------------------------------------------------------|------------------------------------------------------------------------------------------------------------------------------|-------|
| 1                                                                                  | 2                                                                                                                                                                                                                                                                                                                                 | 3                                                                                                                                                                                                                                                                                                                                                                                                                                                                                                                                                                                                                                                                                                      | 4                                                                                                                            | 5     |
| Mild reaction:<br>Treated with supportive care such as anti-pyretics, anti-emetics | Moderate reaction requiring IV fluids or parenteral nutrition; some signs of organ dysfunction (i.e., grade 2 creatinine or grade 3 liver function tests [LFTs] related to CRS and not attributable to any other condition). Hospitalization for management of CRS related symptoms including fevers with associated neutropenia. | More severe reaction:<br><br>Hospitalization required for management of symptoms related to organ dysfunction including grade 4 LFTs or grade 3 creatinine related to CRS and not attributable to any other conditions. This excludes management of fever or myalgias. Includes hypotension treated with IVFs* or low-dose pressors, coagulopathy requiring fresh frozen plasma (FFP) or cryoprecipitate, and hypoxia requiring supplemental oxygen (nasal cannula oxygen, high flow oxygen, Continuous Positive Airway Pressure [CPAP] or Bilateral Positive Airway Pressure [BiPAP]). Patients admitted for management of suspected infection due to fevers and/or neutropenia may have grade 2 CRS. | Life-threatening complications such as hypotension requiring high dose pressors or hypoxia requiring mechanical ventilation. | Death |

\*Defined as hypotension requiring multiple fluid boluses for blood pressure support.

**Table S1. Penn grading system for Cytokine Release Syndrome (CRS).**



**Table S2**

| Sub.            | Age | Sex | Race  | Yrs from Dx | Iso-type | Karyo-type | FISH                    | Mutation                                              | # lines* | Last tx before pheresis, infusion**        |
|-----------------|-----|-----|-------|-------------|----------|------------|-------------------------|-------------------------------------------------------|----------|--------------------------------------------|
| <b>Cohort 1</b> |     |     |       |             |          |            |                         |                                                       |          |                                            |
| 01              | 66  | M   | white | 9.6         | IgGK     | 46XY       | +11, -16q, -17p         | <i>NRAS</i> , <i>TP53</i> , <i>TP53</i>               | 11       | Pom/Dex<br>Pom/Dex                         |
| 02              | 68  | M   | white | 6.3         | IgAK     | 46XY       | +1q, +4p, -17p          | n/a                                                   | 9        | Carfilz/Len/Dex<br>Carfilz/Cyclo/Dex       |
| 03              | 54  | F   | white | 3.1         | IgAL     | n/a        | +1q, t(4;14), -16q      | n/a                                                   | 4        | D-PACE<br>D-AC                             |
| 07              | 44  | M   | white | 1.8         | K        | n/a        | +1q, -4, +11, -14, -16  | <i>NRAS</i> , <i>TP53</i>                             | 9        | Carfilz/Pano<br>Pom/Dex-ACE                |
| 08              | 70  | M   | white | 3.3         | IgAL     | complex    | +1q, -1p, -4, -17p      | n/a                                                   | 6        | Carfilz/Pom/Dex<br>Carfilz/Pom/Dex         |
| 09              | 61  | M   | white | 6.6         | K        | 46XY       | t(11;14), -16q, -17p    | none                                                  | 9        | Daratumumab<br>Pulse Dex                   |
| 10              | 47  | M   | white | 4.9         | IgGL     | n/a        | +1q, t(11;14)           | <i>KRAS</i> , <i>SF3B1</i>                            | 7        | Pom/Dex<br>Pom/Cyclo/Dex + plasma exchange |
| 11              | 57  | F   | AA    | 6.3         | IgGL     | 46XX       | +1q, t(4;14), -17p      | n/a                                                   | 10       | VDT-PACE<br>VDT-PACE                       |
| 15              | 51  | F   | Asian | 4.7         | IgAK     | 46XX       | +1q, t(11;14)           | <i>NRAS</i> , <i>KRAS</i> , <i>BIRC3</i> , <i>KIT</i> | 7        | Pembro/Pom/Dex<br>Pom/Dex                  |
| <b>Cohort 2</b> |     |     |       |             |          |            |                         |                                                       |          |                                            |
| 12              | 51  | F   | white | 2.8         | IgAL     | 46XX       | +1q, -1p, t(4;14), +17p | <i>TET2</i>                                           | 5        | CyBorD<br>CyBorD                           |
| 13              | 59  | M   | white | 9.4         | IgGL     | 46XY       | +11, -16q, -17p         | n/a                                                   | 10       | Salvage ASCT<br>VD-CE                      |
| 14              | 54  | F   | white | 4.9         | IgGK     | 46XX       | t(11;14), -16q, -17p    | n/a                                                   | 7        | Venetoclax<br>none                         |
| 16              | 54  | M   | white | 4.1         | IgGK     | complex    | +1q,                    | <i>BRAF</i>                                           | 7        | D-CE                                       |

CART-BCMA FOR REFRACTORY MM

|                 |    |   |       |      |      |            |                                           |                                              |    |                                                  |
|-----------------|----|---|-------|------|------|------------|-------------------------------------------|----------------------------------------------|----|--------------------------------------------------|
|                 |    |   |       |      |      |            | -16q,<br>-17p                             |                                              |    | D-CE + radiation                                 |
| 22              | 45 | M | white | 2.7  | IgGL | 46XY       | t(11;14),<br>+1q,<br>-17p                 | <i>n/a</i>                                   | 7  | D-ACE<br>none                                    |
| <b>Cohort 3</b> |    |   |       |      |      |            |                                           |                                              |    |                                                  |
| 17              | 64 | F | white | 5.0  | IgAK | 46XX       | t(14;16),<br>+1q,<br>-1p,<br>+11          | <i>n/a</i>                                   | 7  | CPI-610<br>D-AC                                  |
| 19              | 58 | M | white | 4.1  | L    | 46XY       | r(11;14),<br>+1q,<br>+17,<br>-17p         | <i>n/a</i>                                   | 5  | Dara/Ixa/Pom/Dex<br>Dara/Ixa/Pom/Dex             |
| 20              | 61 | M | white | 2.6  | IgGL | <i>n/a</i> | t(4;14),<br>+1q,<br>-17p                  | <i>n/a</i>                                   | 6  | Carfilz/cyclo/pom/dex<br>VD-AC                   |
| 21              | 73 | M | white | 2.5  | IgAK | 46XY       | +1q,<br>+14,<br>+17,<br>-17p              | <i>TET2</i>                                  | 5  | Dara/Pom/Dex<br>Bort/Pom/Dex                     |
| 23              | 63 | M | white | 2.3  | IgGK | 46XY       | none                                      | none                                         | 6  | Carfilz/Pom/Dex/Nelfin<br>VD-PCE                 |
| 25              | 51 | M | AA    | 4.5  | IgGK | 46XY       | t(11;14),<br>+1q                          | <i>FLT3</i>                                  | 7  | Selinexor/Dex<br>Bort/Venetoclax/Dex +<br>XRT    |
| 27              | 58 | F | AA    | 10.3 | IgGK | complex    | t(11;14),<br>+1q,<br>-1p,<br>-16,<br>-17p | <i>BRAF</i> ,<br><i>TET2</i>                 | 13 | Carfilz/Venetoclax/Dex<br>Carfilz/Venetoclax/Dex |
| 29              | 60 | F | white | 1.8  | IgGK | 45X,-X     | none                                      | <i>TET2</i> ,<br><i>RBI</i> ,<br><i>TP53</i> | 3  | VDT-PACE<br>none                                 |
| 32              | 65 | F | white | 14.5 | IgGL | 46XX       | t(4;14),<br>+1q, -17                      | <i>TET2</i> ,<br><i>TET2</i>                 | 6  | Carfilz/Cyclo/Dex<br>Carfilz/Cyclo/Dex           |
| 33              | 75 | M | white | 8.8  | IgGK | hyperdip   | +5, +9,<br>+11,<br>+15,<br>-17p           | <i>RAD21</i>                                 | 5  | Pembro/Len/Dex<br>none                           |
| 34              | 47 | M | white | 2.0  | IgGL | 46XY       | +1q,<br>-1p,<br>+14q                      | <i>MYCN</i> ,<br><i>TPMT</i>                 | 4  | Carfilz/Pom/Dex<br>VD-PACE                       |

**Table S2: Individual subject characteristics.** \*A line of therapy was defined as per IMWG criteria. Radiation was not counted as a line. \*\*Most recent therapy received before T cell collection (“pheresis” – top line) and CART-BCMA infusion (“infusion” – bottom line). All therapy was held for at least 2 weeks prior to pheresis and again for at least 2 weeks prior to infusion (4 weeks for monoclonal antibodies).

AA = African-American; ASCT = autologous stem cell transplant; Bort = bortezomib; Carfilz = carfilzomib; cyclo = cyclophosphamide; CPI-610 = investigational BET inhibitor; CyBorD = cyclophosphamide, bortezomib, dexamethasone; D-AC = dexamethasone + infusional doxorubicin and cyclophosphamide; D-ACE = dexamethasone + infusional doxorubicin, cyclophosphamide, and etoposide; D-CE: dexamethasone + infusional cyclophosphamide and etoposide; D-PACE = dexamethasone + infusional cisplatin, doxorubicin, cyclophosphamide, and etoposide; Dara = daratumumab; Dex = dexamethasone; Dx = diagnosis; hyperdip = hyperdiploid; ixa = ixazomib; K = kappa light chain; L = lambda light chain; Len = lenalidomide; Nelfin = nelfinavir; Pano = panobinostat; Pembro = pembrolizumab; Pom = pomalidomide; Pom/Dex-ACE = pomalidomide, dexamethasone + infusional doxorubicin, cyclophosphamide, and etoposide; Tx = treatment; VD-AC = bortezomib, dexamethasone + infusional doxorubicin and cyclophosphamide; VD-CE = bortezomib, dexamethasone + infusional cyclophosphamide and etoposide; VD-PCE = bortezomib, dexamethasone + infusional cisplatin, cyclophosphamide, etoposide; VDT-PACE = bortezomib, dexamethasone, thalidomide + infusional cisplatin, doxorubicin, cyclophosphamide, and etoposide; Yrs = years.

**Table S3**

| Sub.            | %CD3+<br>in seed<br>culture | CD4:<br>CD8 in<br>seed<br>culture | %CD3+<br>at<br>harvest | CD4:<br>CD8 at<br>harvest | Fold<br>exp | Pop<br>dblg | Trans<br>Eff<br>(%) | Total<br>#CAR+<br>given (x<br>10 <sup>8</sup> ) | Best<br>re-<br>sponse |
|-----------------|-----------------------------|-----------------------------------|------------------------|---------------------------|-------------|-------------|---------------------|-------------------------------------------------|-----------------------|
| <b>Cohort 1</b> |                             |                                   |                        |                           |             |             |                     |                                                 |                       |
| 01              | 52.6                        | 2.04                              | 98.4                   | 2.40                      | 43.5        | 4.54        | 9.6                 | 2.0*                                            | sCR                   |
| 02              | 63                          | 0.40                              | 69.1                   | 1.31                      | 12.7        | 3.67        | 18.2                | 5.0                                             | MR                    |
| 03              | 58.4                        | 2.47                              | 97.6                   | 1.72                      | 17.9        | 4.16        | 25.9                | 2.0*                                            | VGPR                  |
| 07              | 20.3                        | 1.47                              | 94.9                   | 1.60                      | 38.9        | 5.28        | 24.2                | 5.0                                             | PR                    |
| 08              | 20.8                        | 0.31                              | 92.5                   | 2.99                      | 7.9         | 2.98        | 22.7                | 3.5                                             | PD                    |
| 09              | 86.8                        | 0.49                              | 87.5                   | 1.69                      | 10.0        | 3.33        | 22.2                | 5.0                                             | SD                    |
| 10              | 47.3                        | 1.07                              | 96.7                   | 1.32                      | 11.5        | 3.52        | 16.5                | 1.77                                            | PD                    |
| 11              | 21.4                        | 0.81                              | 96.9                   | 1.20                      | 8.7         | 3.11        | 19.4                | 5.0                                             | MR                    |
| 15              | 90.8                        | 0.71                              | 96                     | 1.24                      | 22.6        | 4.50        | 33.3                | 2.0*                                            | VGPR                  |
| <b>Cohort 2</b> |                             |                                   |                        |                           |             |             |                     |                                                 |                       |
| 12              | 80                          | 0.38                              | 96.2                   | 3.23                      | 31.7        | 4.98        | 21.7                | 0.5                                             | SD                    |
| 13              | 72                          | 0.50                              | 86.9                   | 1.72                      | 14.0        | 3.84        | 24.2                | 0.5                                             | MR                    |
| 14              | 94.6                        | 0.81                              | 98.9                   | 2.21                      | 60.4        | 5.92        | 31.8                | 0.5                                             | SD                    |
| 16              | 50.9                        | 1.06                              | 98.1                   | 0.84                      | 30.6        | 4.94        | 21.9                | 0.5                                             | PR                    |
| 22              | 65.1                        | 0.46                              | 98.4                   | 1.39                      | 49.3        | 5.62        | 11                  | 0.5                                             | SD                    |
| <b>Cohort 3</b> |                             |                                   |                        |                           |             |             |                     |                                                 |                       |
| 17              | 84.4                        | 0.59                              | 97.3                   | 1.87                      | 56.8        | 5.83        | 27.4                | 5.0                                             | PR                    |
| 19              | 88.1                        | 0.91                              | 94.9                   | 2.09                      | 16.8        | 4.07        | 13.7                | 5.0                                             | CR                    |
| 20              | 70                          | 0.70                              | 97.4                   | 2.17                      | 32.3        | 5.02        | 8.4                 | 5.0                                             | VGPR                  |
| 21              | 83.5                        | 0.46                              | 98.9                   | 3.26                      | 45.9        | 5.52        | 7.5                 | 5.0                                             | SD                    |
| 23              | 74.7                        | 0.42                              | 97.6                   | 1.46                      | 45.1        | 5.77        | 11                  | 5.0                                             | MR                    |
| 25              | 69.2                        | 0.54                              | 99                     | 0.93                      | 23.7        | 4.57        | 10.7                | 2.0*                                            | PR                    |
| 27              | 69                          | 0.91                              | 97.9                   | 0.90                      | 25.1        | 4.65        | 15                  | 5.0                                             | VGPR                  |
| 29              | 29.8                        | 2.49                              | 91.7                   | 4.55                      | 23.0        | 4.52        | 8.3                 | 5.0                                             | SD                    |
| 32              | 71                          | 1.23                              | 98.3                   | 1.87                      | 40.0        | 5.32        | 8.9                 | 5.0                                             | MR                    |
| 33              | 83.6                        | 0.33                              | 96.5                   | 1.78                      | 31.1        | 4.96        | 8.6                 | 5.0                                             | PR                    |
| 34              | 62.7                        | 1.73                              | 96.4                   | 4.02                      | 29.3        | 4.87        | 14.7                | 5.0                                             | VGPR                  |

**Table S3: CART-BCMA manufacturing and product details.** Frequency of total CD3+, CD3+CD4+, and CD3+CD8+ cells was assessed by flow cytometry at the start of manufacturing (“seed culture,” after elutriation), and at the end of manufacturing (“at harvest”). Aph = apheresis product; fold exp = fold expansion; pop dblgs = population doublings; trans eff = transduction efficiency. MR = minimal response; PD = progressive disease; PR = partial response; sCR = stringent complete response; SD = stable disease; VGPR = very good partial response

\*Subjects 01, 03, 15, and 25 received only 40% of planned dose due to fevers/early CRS.

**Table S4**

| Sub.            | Grade 1                                                                                                                                                                                                                                          | Grade 2                                                                                                                                                                                                                                                                                                                | Grade 3                                                                                                            | Grade 4                                                       | Grade 5 |
|-----------------|--------------------------------------------------------------------------------------------------------------------------------------------------------------------------------------------------------------------------------------------------|------------------------------------------------------------------------------------------------------------------------------------------------------------------------------------------------------------------------------------------------------------------------------------------------------------------------|--------------------------------------------------------------------------------------------------------------------|---------------------------------------------------------------|---------|
| <b>Cohort 1</b> |                                                                                                                                                                                                                                                  |                                                                                                                                                                                                                                                                                                                        |                                                                                                                    |                                                               |         |
| 01              | Dry eye<br>Dry mouth<br>Vomiting<br>Flu-like symptoms<br>Metabolism disorder – other (iron deficiency)<br>Myalgia<br>Headache<br>Ischemia<br>cerebrovascular<br>Nervous system disorder – other (confusion)<br>Vascular disorder – other (edema) | DIC<br>Vertigo<br>Ileus<br>Nausea<br>Fever<br>Lung infection<br>Creatinine increased<br>Thrombocytopenia<br>Musculoskeletal disorder – other (generalized muscle aches)<br>Urinary retention<br>Respiratory disorder – other (pulmonary edema and atelectasis)<br>Skin/SQ disorder – other (skin tear)<br>Hypertension | Anemia<br>Fatigue<br>CRS<br>Alk phos increased<br>AST increased<br>Hypocalcemia<br>Hypokalemia<br>Hypophosphatemia | Lymphopenia                                                   |         |
| 02              | Sinus tachycardia<br>Gastrointestinal disorders – other (loose stool)<br>Nausea<br>Fatigue<br>CRS<br>Dizziness<br>Headache<br>Respiratory disorder – other (nasal and sinus congestion, cough)                                                   |                                                                                                                                                                                                                                                                                                                        | Thrombocytopenia                                                                                                   |                                                               |         |
| 03              | Sinus bradycardia<br>Ear disorder – other (ears feel full, hard to hear)<br>Eye disorder – other (difficulty reading)<br>Constipation                                                                                                            | SVT<br>Fatigue<br>Infection – other (S. mitis/S. oralis bacteremia)<br>Upper respiratory infection<br>Lymphopenia                                                                                                                                                                                                      | CRS<br>UTI<br>Fibrinogen decreased<br>Hypophosphatemia<br>Seizure<br>Pleural effusion<br>Hypertension              | Neutropenia<br>Leukopenia<br>Hypocalcemia<br>RPLS<br>Delirium |         |

# CART-BCMA FOR REFRACTORY MM

|    |                                                                                                                                                             |                                                                                                                                                                                  |                                       |                                                                           |           |
|----|-------------------------------------------------------------------------------------------------------------------------------------------------------------|----------------------------------------------------------------------------------------------------------------------------------------------------------------------------------|---------------------------------------|---------------------------------------------------------------------------|-----------|
|    | Edema<br>Fever<br>Hypokalemia<br>Hypomagnesemia<br>Bone pain<br>Concentration impairment<br>Headache<br>Hoarseness<br>Skin/SQ disorder – other (ecchymosis) | Hypnatremia<br>Musculoskeletal disorder – other (deconditioning, pain base of skull)<br>Intracranial hemorrhage<br>Respiratory disorder – other (post-nasal drip)<br>Hypotension |                                       |                                                                           |           |
| 07 | Infection – other (upper respiratory infection)<br>Skin/SQ disorder – other (rash on face)                                                                  | CRS<br>Dyspepsia<br>Hypoalbuminemia<br>Hypocalcemia<br>Respiratory, thoracic disorders – other (hemothorax)                                                                      | Anemia<br>Hypokalemia<br>Hyponatremia |                                                                           |           |
| 08 | Sinus tachycardia<br>General disorder – other (rigors)                                                                                                      |                                                                                                                                                                                  | Lung infection<br>Delirium            | CRS<br>Thrombocytopenia<br>Encephalopathy<br>Infection – other (fungemia) | Death NOS |
| 09 | Constipation<br>Chills<br>Fatigue<br>Thrombocytopenia<br>Anorexia<br>Hypokalemia                                                                            | Anemia<br>Pericardial effusion<br>CRS<br>Neutropenia<br>Hypocalcemia<br>Headache                                                                                                 | Lung infection                        |                                                                           |           |
| 10 | Chills<br>Fever                                                                                                                                             | Thrombocytopenia                                                                                                                                                                 |                                       |                                                                           |           |
| 11 | Nausea<br>Fatigue<br>Thrombocytopenia<br>Headache<br>Respiratory disorder – other (cough, congestion)                                                       | CRS<br>Infection – other (Clostridium difficile)<br>Hypocalcemia                                                                                                                 | Hypophosphatemia                      |                                                                           |           |
| 15 | Hypocalcemia<br>Hypokalemia<br>Headache<br>Cough<br>Dyspnea                                                                                                 | Fatigue<br>CRS<br>Infection – other (positive test for Shiga toxin)<br>Alk phos increased                                                                                        | Thrombocytopenia<br>Hypoglycemia      | Neutropenia                                                               |           |

# CART-BCMA FOR REFRACTORY MM

|                 |                                                                                                                                                                     |                                                          |                               |                                                              |  |
|-----------------|---------------------------------------------------------------------------------------------------------------------------------------------------------------------|----------------------------------------------------------|-------------------------------|--------------------------------------------------------------|--|
|                 | Respiratory disorders – other (nasal congestion)<br>Alopecia                                                                                                        | Hypotension                                              |                               |                                                              |  |
| <b>Cohort 2</b> |                                                                                                                                                                     |                                                          |                               |                                                              |  |
| 12              | Anemia<br>Vomiting<br>Fatigue<br>Fever<br>Hypocalcemia                                                                                                              | Infection – other (adenovirus)                           | Febrile neutropenia           | Sepsis<br>Neutropenia<br>Leukopenia                          |  |
| 13              | Diarrhea<br>Fatigue<br>ALT increased<br>AST increased<br>Anorexia<br>Dizziness<br>Pruritis<br>Skin/subcutaneous tissue disorder – other (lesions on bilateral ears) | Upper respiratory infection                              | Neutropenia                   |                                                              |  |
| 14              | Back pain<br>Pain in extremity                                                                                                                                      | CRS                                                      | Anemia<br>Febrile neutropenia | Neutropenia<br>Leukopenia                                    |  |
| 16              | Colitis<br>Hypocalcemia<br>Hypokalemia<br>Hypomagnesemia<br>Paresthesia<br>Confusion<br>Hoarseness<br>Sore throat<br>Hypotension                                    | Flu-like symptoms<br>CRS<br>Hypoalbuminemia<br>Epistaxis | Febrile neutropenia           | Lymphopenia<br>Neutropenia<br>Thrombocytopenia<br>Leukopenia |  |
| 22              | Fatigue<br>Myalgia<br>Insomnia                                                                                                                                      | Nausea<br>CRS                                            | Febrile neutropenia           | Lymphopenia<br>Leukopenia                                    |  |
| <b>Cohort 3</b> |                                                                                                                                                                     |                                                          |                               |                                                              |  |
| 17              | Diarrhea<br>Hypocalcemia<br>Hypokalemia<br>Back pain<br>Headache<br>Peripheral sensory neuropathy<br>Insomnia                                                       | Chills<br>CRS<br>Arthralgia                              |                               | Neutropenia<br>Leukopenia                                    |  |

# CART-BCMA FOR REFRACTORY MM

|    |                                                                                                                  |                                                                                                                                                                      |                                                                                                            |                                                                                                  |  |
|----|------------------------------------------------------------------------------------------------------------------|----------------------------------------------------------------------------------------------------------------------------------------------------------------------|------------------------------------------------------------------------------------------------------------|--------------------------------------------------------------------------------------------------|--|
| 19 | Nausea<br>Chills                                                                                                 | Ear and labyrinth disorders – other (seasonal allergies)<br>Gastrointestinal disorders – other (food poisoning)<br>Fever<br>Sinusitis<br>Upper respiratory infection | CRS<br>Lymphopenia<br>Hypophosphatemia<br>Hypertension                                                     |                                                                                                  |  |
| 20 | Constipation<br>Diarrhea<br>Vomiting<br>Chills<br>CPK increased<br>Hypokalemia<br>Back pain<br>Allergic rhinitis | Fatigue<br>ALT increased<br>Hypophosphatemia<br>Dysphasia<br>Lethargy<br>Confusion<br>Hypotension                                                                    | CRS<br>Hyponatremia                                                                                        | AST increased                                                                                    |  |
| 21 | Alk phos increased<br>Hypocalcemia<br>Hyponatremia<br>Epistaxis                                                  | CRS<br>Skin disorders – other (cellulitis)                                                                                                                           | Lymphopenia<br>Neutropenia<br>Thrombocytopenia<br>Leukopenia                                               |                                                                                                  |  |
| 23 | Anal hemorrhage<br>Nausea<br>Edema limbs<br>Hypoalbuminemia<br>Hypocalcemia<br>Tremor                            | CRS<br>Abdominal pain<br>Colitis<br>Diarrhea<br>Vomiting<br>Pain<br>Thrombocytopenia<br>Hypokalemia                                                                  | Febrile neutropenia                                                                                        |                                                                                                  |  |
| 25 | Nausea<br>Facial pain<br>Fatigue<br>Hypomagnesemia<br>Headache<br>Peripheral sensory neuropathy                  | Hypoalbuminemia<br>Hypokalemia<br>Hypercalcemia                                                                                                                      | CRS<br>Hypocalcemia<br>Papilledema                                                                         |                                                                                                  |  |
| 27 | Diarrhea<br>Nausea<br>Oral pain<br>Fatigue<br>Pain<br>Infections – other (upper respiratory infection)           | Sinus bradycardia<br>Edema limbs<br>Urinary tract infection<br>Creatinine increased<br>Neutropenia<br>Hypernatremia                                                  | CRS<br>SVT<br>AST increased<br>Ejection fraction decreased<br>Lymphopenia<br>Leukopenia<br>Hypoalbuminemia | Anemia<br>Thrombocytopenia<br>Hyperglycemia<br>Hypocalcemia<br>Hypokalemia<br>Pleural hemorrhage |  |



|    |                                                                                                        |                                                                               |                                                                                                     |                                               |  |
|----|--------------------------------------------------------------------------------------------------------|-------------------------------------------------------------------------------|-----------------------------------------------------------------------------------------------------|-----------------------------------------------|--|
|    | Back pain<br>Myalgia<br>Pain in extremity<br>Dry skin<br>Hematoma                                      | Wheezing                                                                      | Hyponatremia<br>Encephalopathy<br>Hypertension                                                      |                                               |  |
| 29 | Nausea<br>Fatigue<br>Pain<br>Respiratory disorders – Other (scratchy throat, slight cough)             | Chills<br>CRS<br>Hypoalbuminemia                                              | Abdominal pain<br>Hyponatremia<br>Hypophosphatemia                                                  | Lymphopenia<br>Leukopenia                     |  |
| 32 | Nausea<br>Fatigue<br>Alopecia                                                                          | Diarrhea<br>Encephalopathy<br>Allergic rhinitis                               | Anemia<br>CRS<br>Neutropenia<br>Hypoalbuminemia<br>Hypocalcemia<br>Hyponatremia<br>Hypophosphatemia | Lymphopenia<br>Thrombocytopenia<br>Leukopenia |  |
| 33 | Oral pain<br>Diarrhea<br>Fatigue<br>Flu-like symptoms<br>Arthralgia<br>Flank pain<br>Allergic rhinitis | Chills<br>CRS<br>Hypoalbuminemia                                              | Febrile neutropenia                                                                                 | Neutropenia                                   |  |
| 34 | Diarrhea<br>Nausea<br>Sinus tachycardia<br>Confusion<br>ALT increased                                  | CRS<br>Thrombocytopenia<br>Hypocalcemia<br>Flu-like symptoms<br>AST increased | Leukopenia<br>Hypophosphatemia<br>Hyponatremia                                                      | Lymphopenia<br>Neutropenia                    |  |

**Table S4. Individual subject adverse events.** All events regardless of attribution are listed. If an event occurred more than once in same patient, highest grade is reported. Alk phos = alkaline phosphatase; ALT = alanine aminotransferase; AST = aspartate aminotransferase; CPK = creatine phosphokinase; CRS=cytokine release syndrome; DIC = disseminated intravascular coagulation; NOS = not otherwise specified; RPLS = reversible posterior leukoencephalopathy syndrome (also known as posterior reversible encephalopathy syndrome (PRES)); SQ = subcutaneous; SVT = supraventricular tachycardia; UTI = urinary tract infection

|                                        | <b>Grade 1</b> | <b>Grade 2</b> | <b>Grade 3</b> | <b>Grade 4</b> | <b>All (n, %)</b> |
|----------------------------------------|----------------|----------------|----------------|----------------|-------------------|
| <b>CRS<br/>(total, n=25)</b>           | 2              | 12             | 7              | 1              | 22 (88%)          |
| Cohort 1<br>(n=9)                      | 1              | 4              | 2              | 1              | 8 (89%)           |
| Cohort 2<br>(n=5)                      | 0              | 3              | 0              | 0              | 3 (60%)           |
| Cohort 3<br>(n=11)                     | 1              | 5              | 5              | 0              | 11 (100%)         |
|                                        |                |                |                |                |                   |
| <b>Neurotoxicity<br/>(total, n=25)</b> | 3              | 2              | 1              | 2              | 8 (32%)           |
| Cohort 1<br>(n=9)                      | 1              | 0              | 0              | 2              | 3 (33%)           |
| Cohort 2<br>(n=5)                      | 1              | 0              | 0              | 0              | 1 (20%)           |
| Cohort 3<br>(n=11)                     | 1              | 2              | 1              | 0              | 4 (36%)           |

**Table S5. Cytokine release syndrome (CRS) and neurotoxicity by cohort.** All events regardless of attribution are listed. CRS graded as per Penn grading scale (Suppl. Table S1).

| Sub.            | Day of peak | %CAR+ of CD3+ | %CAR+ of CD4+ | %CAR+ of CD8+ | %HLADR+ of CAR+ | Best response |
|-----------------|-------------|---------------|---------------|---------------|-----------------|---------------|
| <b>Cohort 1</b> |             |               |               |               |                 |               |
| 01              | 10          | 89.5          | 8.6           | 92.3          | 97              | sCR           |
| 02              | 9           | 2.8           | 1.4           | 5.0           | 82              | MR            |
| 03              | 14          | 76.2          | 13.7          | 85.9          | 97              | VGPR          |
| 07              | 10          | 29.2          | 7.3           | 39.3          | 89              | PR            |
| 08              | 16          | 9.3           | 0.4           | 16.9          | 95              | PD            |
| 09              | 11*         | *             | *             | *             | *               | SD            |
| 10              | 30          | 1.9           | 0.1           | 2.0           | 21              | PD            |
| 11              | 8           | 18.2          | 14.6          | 25.2          | 94              | MR            |
| 15              | 10          | 28.1          | 6.3           | 51.0          | 96              | VGPR          |
| <b>Cohort 2</b> |             |               |               |               |                 |               |
| 12              | 10          | 2.0           | 0.8           | 2.3           | 76              | SD            |
| 13              | 13          | 8.4           | 2.9           | 13.2          | 92              | MR            |
| 14              | 10          | 7.8           | 3.5           | 10.6          | 95              | SD            |
| 16              | 14          | 47.1          | 12.1          | 50.3          | 98              | PR            |
| 22              | 9           | 4.3           | 0.6           | 8.6           | 94              | SD            |
| <b>Cohort 3</b> |             |               |               |               |                 |               |
| 17              | 9           | 22.1          | 10.4          | 27.4          | 96              | PR            |
| 19              | 15          | 9.7           | 8.9           | 10.2          | 87              | CR            |
| 20              | 15          | 59.2          | 22.4          | 65.1          | 99              | VGPR          |
| 21              | 9           | 16.0          | 9.2           | 19.9          | 97              | SD            |
| 23              | 10          | 13.8          | 6.6           | 17.3          | 93              | MR            |
| 25              | 10          | 5.1           | 3.8           | 5.9           | 85              | PR            |
| 27              | 14          | 42.9          | 4.9           | 47.3          | 88              | VGPR          |
| 29              | 7           | 4.1           | 2.8           | 15.0          | 77              | SD            |
| 32              | 10          | 36.2          | 6.1           | 46.4          | 97              | MR            |
| 33              | 11          | 41.8          | 29.8          | 46.9          | 91              | PR            |
| 34              | **          | **            | **            | **            | **              | VGPR          |

**Table S6. Characteristics of peripheral blood CART-BCMA+ cells at peak expansion.**

CART-BCMA cells were assessed by flow cytometry as in Fig. S3. At day of peak expansion, the frequency of CAR+ cells within CD3+, CD4+, and CD8+ populations are listed. Activation status at peak expansion (as measured by % of CAR+ cells expressing HLA-DR) is also shown. MR = minimal response; PD = progressive disease; PR = partial response; sCR = stringent complete response; SD = stable disease; VGPR = very good partial response

\*Peak determined by qPCR; CAR+ cells not detectable by flow. \*\*No sample available between days 10-21 so peak could not be determined.

| Sub.            | Day 28<br>blood | Day 28<br>BM | 3 month<br>blood | 3 month<br>BM | Other (site, day)                                                                                             |
|-----------------|-----------------|--------------|------------------|---------------|---------------------------------------------------------------------------------------------------------------|
| <b>Cohort 1</b> |                 |              |                  |               |                                                                                                               |
| 01              | 23447.33        | 10458.66     | 4373.95          | n/a           | n/a                                                                                                           |
| 02              | 454.57          | 383.62       | 334.90           | n/a           | n/a                                                                                                           |
| 03              | 220081.08*      | 109964.97*   | 9517.67          | 9934.97       | CSF, D4: 3285.88<br>CSF, D16: 158038.74<br>Pleural fluid, D8:<br>23941.97<br>Pleural fluid, D18:<br>144516.62 |
| 07              | 1757.60         | 2140.31      | n/a              | n/a           | n/a                                                                                                           |
| 08              | n/a             | n/a          | n/a              | n/a           | n/a                                                                                                           |
| 09              | 32.15           | 16.75        | n/a              | n/a           | n/a                                                                                                           |
| 10              | 62.64           | 0.00         | n/a              | n/a           | n/a                                                                                                           |
| 11              | 731.44          | n/a          | 218.26           | n/a           | n/a                                                                                                           |
| 15              | 724.49          | 1084.16      | 32.58            | 99.48         | n/a                                                                                                           |
| <b>Cohort 2</b> |                 |              |                  |               |                                                                                                               |
| 12              | 140.60          | 25.59        | n/a              | n/a           | n/a                                                                                                           |
| 13              | 193.80          | 43.64        | 94.70            | 27.04         | n/a                                                                                                           |
| 14              | 66.69           | 255.76       | 8.80             | 0.00          | n/a                                                                                                           |
| 16              | 25919.10        | 22077.89     | n/a              | n/a           | n/a                                                                                                           |
| 22              | 34.56           | 22.09        | 77.71            | 63.76         | n/a                                                                                                           |
| <b>Cohort 3</b> |                 |              |                  |               |                                                                                                               |
| 17              | 1639.98         | 1398.82      | 1392.25          | 649.69        | n/a                                                                                                           |
| 19              | 12987.83        | 6578.03      | 153.88           | 117.53        | n/a                                                                                                           |
| 20              | 43463.65        | 28086.46     | 4107.95          | 5223.76       | n/a                                                                                                           |
| 21              | 8372.96         | 1161.92      | 96.11            | n/a           | n/a                                                                                                           |
| 23              | 5946.81         | n/a          | 102.68           | n/a           | n/a                                                                                                           |
| 25              | 256.33          | 259.97       | 149.20           | 160.33        | n/a                                                                                                           |
| 27              | 51014.95        | 41242.37     | 14271.48         | 9634.66       | Pleural fluid, D15:<br>58511.99                                                                               |
| 29              | 738.84          | 210.05       | n/a              | n/a           | n/a                                                                                                           |
| 32              | 6983.98         | 7055.94      | 58.15            | 15.72         | n/a                                                                                                           |
| 33              | 7539.99         | 5142.13      | 230.66           | 39.09         | n/a                                                                                                           |
| 34              | 5199.07         | 1512.03      | n/a              | n/a           | n/a                                                                                                           |

**Table S7. CART-BCMA engraftment by qPCR in blood, bone marrow, and other sites.**

CART-BCMA levels (copies/ $\mu$ g genomic DNA) were generally comparable in blood and marrow at tested timepoints. CART-BCMA was found at high levels in CSF and pleural fluid of subject 03, and pleural fluid of subject 27. BM = bone marrow; CSF = cerebrospinal fluid. n/a = not available. \*Assays performed on day 45.

| Cytokine       | Median peak fold increase: CRS Gr 0-2 | Median peak fold increase: CRS Gr 3-4 or Gr 2 + toci | p-value |
|----------------|---------------------------------------|------------------------------------------------------|---------|
| IL-6*          | 3.88                                  | 76.26                                                | <0.0001 |
| IFN- $\gamma$  | 1.26                                  | 11.95                                                | <0.0001 |
| IL-2R $\alpha$ | 4.13                                  | 18.40                                                | <0.0001 |
| MIP-1 $\alpha$ | 1.35                                  | 3.47                                                 | <0.0001 |
| IL-15          | 1.71                                  | 12.81                                                | 0.0004  |
| IL-1RA         | 2.33                                  | 19.68                                                | 0.0036  |
| MCP-1          | 2.11                                  | 6.99                                                 | 0.0044  |
| GM-CSF         | 2.69                                  | 36.27                                                | 0.0052  |
| IL-1 $\beta$   | 1.28                                  | 2.23                                                 | 0.0052  |
| MIG            | 6.81                                  | 39.14                                                | 0.008   |
| MIP-1 $\beta$  | 1.49                                  | 2.39                                                 | 0.013   |
| IL6 pre-Toci** | 3.88                                  | 11.48                                                | 0.014   |
| IL-5           | 2.84                                  | 35.32                                                | 0.019   |
| VEGF           | 1.93                                  | 3.68                                                 | 0.022   |
| IL-17          | 1.16                                  | 3.13                                                 | 0.026   |
| IL-7           | 2.24                                  | 6.18                                                 | 0.10    |
| IP-10          | 6.63                                  | 10.97                                                | 0.10    |
| IL-8           | 8.65                                  | 30.72                                                | 0.20    |
| IL-4           | 1.29                                  | 1.95                                                 | 0.24    |
| IL-10          | 13.84                                 | 15.82                                                | 0.53    |

**Table S8: Peak fold increase in serum cytokines and severity of cytokine release syndrome (CRS).** Serum cytokine concentrations in pg/ml through day 28 were measured by Luminex assay. The median peak fold increase over baseline for each cytokine listed for subjects with no CRS, grade 1 CRS, or grade 2 CRS not receiving tocilizumab (CRS gr 0-2) was compared to median peak fold increase for subjects with grade 3-4 CRS or grade 2 CRS receiving tocilizumab (CRS Gr 3-4 or Gr 2 + toci). Exact p-value by Mann-Whitney test is listed when applicable. \*Peak fold-increase of IL-6 at any time post-infusion. \*\*IL-6 pre-Toci = for subjects who got tocilizumab (n=6) or siltuximab (n=1), only pre-tocilizumab or pre-siltuximab IL-6 values were included in analysis. Because the statistical analyses performed here are exploratory and hypothesis-generating in nature, no adjustment of the p-values was made for multiple comparisons.

| Cytokine        | Median peak fold increase:<br>No neurotox | Median peak fold increase:<br>Any neurotox | p-value |
|-----------------|-------------------------------------------|--------------------------------------------|---------|
| IL-6*           | 3.92                                      | 76.26                                      | 0.0002  |
| IFN- $\gamma$   | 1.28                                      | 15.77                                      | 0.0002  |
| IL-1RA          | 2.33                                      | 19.68                                      | 0.0015  |
| MIP-1 $\alpha$  | 1.53                                      | 3.47                                       | 0.006   |
| GM-CSF          | 3.46                                      | 36.27                                      | 0.013   |
| IL-15           | 1.76                                      | 10.54                                      | 0.016   |
| IL-1 $\beta$    | 1.32                                      | 3.70                                       | 0.018   |
| IP-10           | 5.80                                      | 20.44                                      | 0.019   |
| IL-7            | 3.29                                      | 10.28                                      | 0.019   |
| IL-2R $\alpha$  | 4.46                                      | 20.86                                      | 0.019   |
| IL-6 pre-Toci** | 3.92                                      | 20.08                                      | 0.032   |
| VEGF            | 1.93                                      | 3.68                                       | 0.050   |
| MIP-1 $\beta$   | 1.56                                      | 2.24                                       | 0.056   |
| MIG             | 7.17                                      | 39.14                                      | 0.057   |
| MCP-1           | 2.13                                      | 6.41                                       | 0.066   |
| IL-8            | 8.65                                      | 36.77                                      | 0.12    |
| IL-17           | 1.32                                      | 1.57                                       | 0.19    |
| IL-5            | 5.15                                      | 8.54                                       | 0.26    |
| IL-4            | 1.47                                      | 2.20                                       | 0.40    |
| IL-10           | 13.70                                     | 27.51                                      | 0.41    |

**Table S9: Peak fold increase in serum cytokines and neurotoxicity.** Serum cytokine concentrations in pg/ml through day 28 were measured by Luminex assay. The median peak fold increase over baseline for each cytokine listed for subjects with no neurotoxicity (neurotox) was compared to median peak fold increase for subjects with any grade neurotoxicity. Exact p-value by Mann-Whitney test is listed. \*Peak fold-increase of IL-6 at any time post-infusion. \*\*IL-6 pre-Toci = for subjects who got tocilizumab (n=6) or siltuximab (n=1), only pre-tocilizumab or pre-siltuximab IL-6 values were included in analysis. Because the statistical analyses performed here are exploratory and hypothesis-generating in nature, no adjustment of the p-values was made for multiple comparisons.

| Sub             | Pre<br>% + | Pre<br>FMO<br>MFI | Pre<br>BCMA<br>MFI | D28<br>% + | D28<br>FMO<br>MFI | D28<br>BCMA<br>MFI | D90<br>% + | D90<br>BCMA<br>MFI | D90<br>BCMA<br>MFI | Best<br>response |
|-----------------|------------|-------------------|--------------------|------------|-------------------|--------------------|------------|--------------------|--------------------|------------------|
| <b>Cohort 1</b> |            |                   |                    |            |                   |                    |            |                    |                    |                  |
| 01              | 95         | 568               | 10864              | n/a        | n/a               | n/a                | n/a        | n/a                | n/a                | sCR              |
| 02              | 93         | 355               | 2375               | 97         | 483               | 3254               | n/a        | n/a                | n/a                | MR               |
| 03              | 84         | 265               | 1873               | n/a        | n/a               | n/a                | 19*        | 78*                | 268*               | VGPR             |
| 07              | n/a        | n/a               | n/a                | 84         | 273               | 1426               | n/a        | n/a                | n/a                | PR               |
| 08              | 99         | 124               | 6859               | n/a        | n/a               | n/a                | n/a        | n/a                | n/a                | PD               |
| 09              | 28         | 53                | 206                | 94         | 204               | 1116               | n/a        | n/a                | n/a                | SD               |
| 10              | 83         | 192               | 1998               | 99         | 54                | 2140               | n/a        | n/a                | n/a                | PD               |
| 11              | 81         | 332               | 1844               | 62         | 49                | 832                | n/a        | n/a                | n/a                | MR               |
| 15              | 99         | 249               | 24842              | n/a        | n/a               | n/a                | 100        | 362                | 30685              | VGPR             |
| <b>Cohort 2</b> |            |                   |                    |            |                   |                    |            |                    |                    |                  |
| 12              | 100        | -142              | 6755               | 100        | 187               | 7268               | n/a        | n/a                | n/a                | SD               |
| 13              | n/a        | n/a               | n/a                | n/a        | n/a               | n/a                | n/a        | n/a                | n/a                | MR               |
| 14              | 99         | 192               | 4317               | 98         | 172               | 2388               | n/a        | n/a                | n/a                | SD               |
| 16              | 97         | 366               | 4039               | 48         | 394               | 850                | 93         | 488                | 3819               | PR               |
| 22              | 100        | 321               | 5947               | 99         | 271               | 4947               | 100        | 126                | 5599               | SD               |
| <b>Cohort 3</b> |            |                   |                    |            |                   |                    |            |                    |                    |                  |
| 17              | 87         | 646               | 2667               | 27         | 295               | 784                | 76         | 350                | 1543               | PR               |
| 19              | 98         | 429               | 2923               | 65         | 316               | 992                | n/a        | n/a                | n/a                | CR               |
| 20              | 89         | 394               | 2643               | 29         | 369               | 944                | 36         | 185                | 377                | VGPR             |
| 21              | 99         | 314               | 2704               | 86         | 252               | 1108               | n/a        | n/a                | n/a                | SD               |
| 23              | n/a        | n/a               | n/a                | n/a        | n/a               | n/a                | n/a        | n/a                | n/a                | MR               |
| 25              | 97         | 283               | 4000               | 54         | 259               | 833                | 92         | 223                | 2501               | PR               |
| 27              | 100        | 618               | 6548               | 74         | 242               | 964                | 70         | 159                | 616                | VGPR             |
| 29              | n/a        | n/a               | n/a                | n/a        | n/a               | n/a                | n/a        | n/a                | n/a                | SD               |
| 32              | 92         | 176               | 3482               | 85         | 169               | 1472               | n/a        | n/a                | n/a                | MR               |
| 33              | n/a        | n/a               | n/a                | n/a        | n/a               | n/a                | n/a        | n/a                | n/a                | PR               |
| 34              | 100        | 303               | 17109              | 92         | 1607              | 5001               | 100        | 309                | 11232              | VGPR             |

**Table S10. Details of BCMA expression on myeloma cells.** Bone marrow myeloma cells were gated and BCMA expression analyzed as per Suppl. Figure S8. The percentage of myeloma cells expressing BCMA (% +), as well as the mean fluorescence intensity (MFI) for BCMA and FMO (fluorescence minus one) negative control are depicted. n/a = not available. Pre=pre-treatment. D28 = day 28 post-treatment. D90 = day 90 post-treatment. Sub = subject. \*actually D164.

### Supplementary References

1. Kalos M, et al. T cells with chimeric antigen receptors have potent antitumor effects and can establish memory in patients with advanced leukemia. *Sci Transl Med*. 2011;3(95):95ra73.
2. Flores-Montero J, et al. Next Generation Flow for highly sensitive and standardized detection of minimal residual disease in multiple myeloma. *Leukemia*. 2017;31(10):2094-103.
