# Supplementary material for: B cell maturation antigen–specific CAR T cells are clinically active in multiple myeloma
Source: JCI journal article supplement (doi:10.1172/jci126397), 2019-03-21
Supplement: sd2 [file 2]

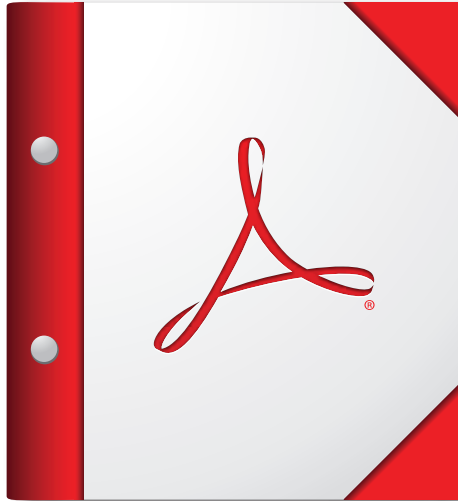

**For the best experience, open this PDF portfolio in  
Acrobat X or Adobe Reader X, or later.**

**Get Adobe Reader Now!**
